# Supplementary material for: Evidence for Antisense Transcription Associated with MicroRNA Target mRNAs in Arabidopsis
Source: PLoS Genet. 2009 Apr 17;5(4):e1000457. doi: 10.1371/journal.pgen.1000457 (PMC2664332; doi:10.1371/journal.pgen.1000457)
Supplement: Table S2 — MPSS mRNA signatures associated with miRNA targets and paralogous non-target genes. (0.57 MB XLS) [file pgen.1000457.s020.xls]

## Sheet: Validated targets
Supplementary Talbe II. MPSS mRNA Signatures for Validated miRNA Targets, Predicted Targets and Pseudo Paralogs from Massively Parallel Signature Sequencing (MPSS) Plus Database*
* http://mpss.udel.edu/at/
						Normalized abundance for MPSS mRNA sense signatures (replace 0 by 1)																		Abundance for MPSS mRNA sense signatures-raw data																		Abundance for MPSS mRNA antisense signatures-raw data
miRNA	Target	5' End	3' End	Len (bp)		CAF	INF	LEF	ROF	SIF	AP1	AP3	AGM	INS	ROS	SAP	S04	S52	LES	GSE	CAS	SIS		CAF	INF	LEF	ROF	SIF	AP1	AP3	AGM	INS	ROS	SAP	S04	S52	LES	GSE	CAS	SIS		CAF	INF	LEF	ROF	SIF	AP1	AP3	AGM
>miR156	AT1G27370	9508468	9505188	3280		6	70	6	1	32	15	92	15	110	1	4	15	1	22	1	4	79		6	70	6	0	32	15	92	15	110	1	4	15	0	22	1	4	79		0	2	2	0	0	9	10	0
>miR156	AT5G43270	17381001	17377529	3472		6	35	14	1	17	9	18	6	25	1	29	1	17	8	1	1	13		6	35	14	1	17	9	18	6	25	0	29	1	17	8	0	0	13		0	0	0	0	0	2	14	0
>miR157	AT1G53160	19810087	19811276	1189		1	38	5	1	34	57	68	74	27	1	127	1	3	1	1	1	45		0	38	5	0	34	57	68	74	27	0	127	0	3	0	0	0	45		0	41	9	0	26	12	67	1256
>miR156	AT2G33810	14312077	14313148	1071		1	139	6	4	302	503	670	498	459	1	401	47	1	29	1	1	323		0	139	6	4	302	503	670	498	459	0	401	47	0	29	0	0	323		0	3	0	0	0	12	16	20
>miR159	AT5G06100	1837908	1840728	2820		1	1	1	1	1	1	1	1	1	1	1	1	1	1	1	1	1		0	0	0	0	0	0	0	0	0	0	0	0	0	0	0	0	0		0	0	0	0	0	0	0	0
>miR159	AT3G11440	3602099	3605110	3011		1	1	1	1	1	1	1	1	1	1	1	1	1	1	1	1	1		0	0	0	0	0	0	0	0	0	0	0	0	0	0	0	0	0		0	0	0	0	0	0	0	0
>mir156	AT5G50670	20635065	20632930	2135		1	1	1	1	1	1	1	1	1	1	1	1	1	1	1	1	1		0	0	0	0	0	0	0	0	0	0	0	0	0	0	0	0	0		0	0	0	0	0	0	0	0
>mir156	AT5g57920	23470825	23471623	798		1	1	1	1	1	1	1	1	1	1	1	1	1	1	1	1	1		0	0	0	0	0	0	0	0	0	0	0	0	0	0	0	0	0		0	0	0	0	0	0	0	0
>mir156	AT2g42200	17594485	17596708	2223		1	117	4	1	1	20	64	80	56	2	39	1	1	4	5	7	1		0	117	4	1	0	20	64	80	56	2	39	0	0	4	5	7	0		0	0	0	0	0	10	2	7
>miR160	AT1G77850	29277207	29280313	3106		64	66	1	15	13	3	21	9	13	25	76	6	19	1	1	29	22		64	66	0	15	13	3	21	9	13	25	76	6	19	0	0	29	22		0	0	0	0	0	0	0	0
>miR160	AT2G28350	12121408	12123925	2517		81	15	12	7	6	30	9	12	44	40	4	3	1	21	1	145	1		81	15	12	7	6	30	9	12	44	40	4	3	0	21	0	145	0		0	0	0	0	0	0	5	0
>miR160	AT4G30080	14706342	14703207	3135		29	22	7	8	32	5	22	48	41	19	19	2	11	23	11	45	46		29	22	7	8	32	5	22	48	41	19	19	2	11	23	11	45	46		0	0	0	0	0	0	0	0
>miR161	AT1G06580	2016053	2014002	2051		1	1	1	1	2	1	1	1	1	1	3	1	1	7	1	1	1		0	0	0	0	2	0	0	0	0	0	3	0	0	7	0	0	0		0	0	0	0	0	0	0	0
>miR162	AT1G01040	23146	31227	8081		21	26	21	12	50	27	31	26	32	24	7	1	1	13	1	69	80		21	26	21	12	50	27	31	26	32	24	7	0	0	13	0	69	80		0	0	0	0	0	6	3	4
>miR163	AT1G66690	24874513	24873217	1296		1	1	1	2	7	1	1	1	1	7	1	1	1	1	1	1	1		0	0	0	2	7	0	0	0	0	7	0	0	0	0	0	0	0		0	0	0	0	0	0	0	0
>miR163	AT1G66700	24878409	24876954	1455		1	1	1	1	1	1	1	1	1	1	1	1	1	1	1	1	1		0	0	0	0	0	0	0	0	0	0	0	0	0	0	0	0	0		0	0	0	0	0	0	0	0
>miR163	AT1G66720	24884843	24886143	1300		1	1	1	1	1	1	1	1	1	1	1	1	1	1	1	1	1		0	0	0	0	0	0	0	0	0	0	0	0	0	0	0	0	0		0	0	0	0	0	0	0	0
>miR163	AT3G44860	16390618	16392055	1437		1	2	26	4	1	1	1	1	1	1	1	13	48	2	1	1	1		0	2	26	4	0	0	0	0	0	0	0	13	48	2	0	0	0		0	0	0	0	0	0	0	0
>miR164	AT1G56010	20952946	20950236	2710		4	1	5	71	2	1	1	1	1	57	1	1	3	32	1	2	9		4	0	5	71	2	0	0	0	0	57	0	0	3	32	0	2	9		0	0	0	4	0	0	0	0
>miR164	AT3G15170	5109890	5111454	1564		1	1	1	1	1	1	1	1	1	1	1	1	1	1	1	1	1		0	0	0	0	0	0	0	0	0	0	0	0	0	0	0	0	0		0	0	0	0	0	0	0	0
>miR164	AT5G07680	2435876	2437500	1624		1	1	1	1	1	1	1	1	1	1	1	1	1	1	1	1	1		0	0	0	0	0	0	0	0	0	0	0	0	0	0	0	0	0		0	0	0	0	0	0	0	0
>miR164	AT5G53950	21921049	21919192	1857		1	1	1	1	1	1	1	1	1	1	1	1	1	1	1	1	1		0	0	0	0	0	0	0	0	0	0	0	0	0	0	0	0	0		0	0	0	0	0	0	0	0
>miR164	AT5G61430	24719987	24718348	1639		1	1	1	1	1	1	1	1	1	1	1	1	1	1	1	1	1		0	0	0	0	0	0	0	0	0	0	0	0	0	0	0	0	0		0	0	0	0	0	0	0	0
>miR166	AT1G30490	10800943	10796117	4826		1	1	1	1	4	2	3	1	4	1	33	1	1	9	6	29	1		0	0	0	0	4	2	3	0	4	0	33	0	0	9	6	29	0		0	0	0	0	0	0	9	9
>miR166	AT1G52150	19418347	19413380	4967		5	1	1	1	1	9	4	1	1	6	1	1	1	1	1	18	1		5	0	0	0	0	9	4	0	1	6	0	0	0	0	1	18	0		0	0	0	0	0	5	19	1
>miR166	AT2G34710	14651352	14646402	4950		142	50	44	63	77	13	21	13	47	26	5	1	1	37	5	19	2		142	50	44	63	77	13	21	13	47	26	5	0	0	37	5	19	2		0	0	0	0	0	2	0	0
>miR166	AT5G60690	24414249	24419421	5172		42	21	12	55	62	15	21	47	28	37	10	1	1	2	1	46	55		42	21	12	55	62	15	21	47	28	37	10	1	0	2	0	46	55		6	2	2	0	6	7	6	3
>miR166	AT4G32880	15868629	15863456	5173		96	146	42	71	42	9	8	2	7	48	1	1	1	1	1	25	40		96	146	42	71	42	9	8	2	7	48	1	0	0	0	0	25	40		0	0	0	0	0	0	0	0
>miR167	AT1G30330	10690781	10685804	4977		50	472	66	58	116	25	246	188	169	4	26	32	1	47	11	25	15		50	472	66	58	116	25	246	188	169	4	26	32	1	47	11	25	15		0	0	0	0	0	20	10	19
>miR167	AT5G37020	14647258	14651617	4359		1	1	1	1	1	1	1	2	4	1	1	1	1	1	1	1	1		0	0	0	0	0	0	0	2	4	0	0	0	0	0	0	0	0		0	0	0	0	0	4	4	24
>miR168	AT1G48410	17896254	17889766	6488		16	12	7	1	18	239	177	124	255	116	62	41	81	150	112	189	168		16	12	7	0	18	239	177	124	255	116	62	41	81	150	112	189	168		4	0	3	9	12	27	20	8
>miR169	AT1G17590	6052561	6050215	2346		62	6	7	6	11	3	1	1	1	10	1	4	1	4	1	35	1		62	6	7	6	11	3	1	0	0	10	0	4	0	4	0	35	0		0	0	0	0	0	0	0	0
>miR169	AT1G54160	20223119	20221003	2116		1	1	1	1	1	1	1	7	7	1	1	1	1	21	1	1	1		0	0	0	1	0	0	0	7	7	0	0	0	0	21	1	0	0		0	0	0	0	0	0	0	0
>miR169	AT1G72830	27411630	27409118	2512		22	2	1	5	5	1	3	1	1	1	1	1	1	1	1	1	1		22	2	0	5	5	0	3	0	1	0	0	0	0	1	0	0	0		0	0	0	5	4	0	0	0
>miR169	AT3G05690	1678938	1676552	2386		22	10	10	15	3	14	7	1	4	30	5	3	1	41	1	40	4		22	10	10	15	3	14	7	1	4	30	5	3	1	41	0	40	4		0	0	0	0	0	0	0	0
>miR169	AT5G06510	1984992	1987045	2053		18	5	2	9	27	1	1	1	1	1	1	1	1	1	1	1	1		18	5	2	9	27	0	0	0	0	0	0	0	0	0	0	0	0		0	0	0	0	0	0	0	0
>miR171	AT2G45160	18627225	18624937	2288		62	49	43	58	17	42	51	40	58	39	18	15	8	17	54	82	127		62	49	43	58	17	42	51	40	58	39	18	15	8	17	54	82	127		0	0	0	2	0	2	0	0
>miR171	AT3G60630	22423583	22421340	2243		22	90	25	60	78	5	4	6	4	1	16	1	1	1	26	7	2		22	90	25	60	78	5	4	6	4	0	16	0	0	0	26	7	2		0	0	0	0	0	1	0	0
>miR171	AT4G00150	59286	57199	2087		13	7	10	10	1	1	7	1	4	1	1	1	1	1	1	1	3		13	7	10	10	0	0	7	0	4	0	0	0	0	0	0	0	3		2	0	0	0	0	1	0	0
>miR172	AT4G36920	17400844	17403329	2485		44	35	18	13	29	17	37	115	42	91	84	21	23	64	51	148	66		44	35	18	13	29	17	37	115	42	91	84	21	23	64	51	148	66		4	0	0	6	0	0	3	0
>miR172	AT5G60120	24225012	24228950	3938		60	32	35	22	25	5	19	13	12	11	19	1	3	2	27	10	23		60	32	35	22	25	5	19	13	12	11	19	0	3	2	27	10	23		0	0	0	0	0	0	0	0
>miR172	AT5G67180	26821475	26819175	2300		5	30	5	1	23	48	37	11	16	1	17	137	1	1	1	5	8		5	30	5	0	23	48	37	11	16	0	17	137	0	0	0	5	8		0	0	0	0	0	0	0	0
>miR173	AT1G50055	18553710	18552872	838		10	1	22	4	3	1	1	2	1	25	1	1	1	4	25	12	3		10	1	22	4	3	0	0	2	0	25	0	0	0	4	25	12	3		0	0	0	0	0	0	0	0
>miR173	AT2G27400	11729546	11728617	929		1	1	1	1	1	1	1	1	1	1	1	1	1	1	1	1	1		0	0	0	0	0	0	0	0	0	0	0	0	0	0	0	0	0		0	0	0	0	0	0	0	0
>miR173	AT2G39675	16545355	16544366	989		1	1	1	1	1	1	1	1	1	1	1	1	1	1	1	1	1		0	0	0	0	0	0	0	0	0	0	0	0	0	0	0	0	0		0	0	0	0	0	0	0	0
>miR173	AT2G39681	16547495	16546462	1033		58	22	77	100	77	2	12	1	2	4	4	1	1	1	1	3	1		58	22	77	100	77	2	12	0	2	4	4	0	0	0	0	3	0		0	0	6	0	9	0	0	0
>miR319	AT1G30210	10630594	10627169	3425		1	1	1	1	1	1	4	1	1	1	1	1	1	4	1	2	1		0	0	0	0	0	0	4	0	0	0	0	0	0	4	0	2	0		0	0	0	0	0	0	0	0
>miR319	AT1G53230	19855393	19853456	1937		3	57	65	13	106	18	15	108	33	6	66	22	19	50	8	2	59		3	57	65	13	106	18	15	108	33	6	66	22	19	50	8	2	59		0	0	2	0	0	0	3	0
>miR319	AT2G31070	13229686	13227555	2131		15	16	69	1	18	1	8	17	8	1	1	1	1	28	1	1	3		15	16	69	0	18	1	8	17	8	0	0	0	0	28	0	0	3		0	2	0	0	0	4	2	0
>miR319	AT3G15030	5062026	5064122	2096		1	3	2	1	1	17	18	93	62	1	3	25	19	6	1	1	26		0	3	2	0	0	17	18	93	62	0	3	25	19	6	0	0	26		0	0	0	0	0	0	0	0
>miR319	AT4G18390	10165573	10162964	2609		1	1	1	1	1	1	1	1	1	1	1	1	1	1	1	1	1		0	0	0	0	0	0	0	0	0	0	0	0	0	0	0	0	0		1	0	5	0	3	1	0	0
>miR390	AT3G17185	5861497	5862443	946		35	26	111	56	50	12	19	3	14	112	4	1	2	16	19	129	80		35	26	111	56	50	12	19	3	14	112	4	0	2	16	19	129	80		0	0	3	3	0	0	0	0
>miR390	AT5G57735	23411231	23411726	495		1	3	1	1	6	3	10	1	7	1	17	1	1	1	1	1	1		0	3	0	0	6	3	10	0	7	0	17	0	0	0	0	0	0		0	0	0	0	0	0	0	0
>miR393	AT1G12820	4371291	4368758	2533		65	65	83	40	42	25	52	24	47	41	51	26	27	26	53	36	129		65	65	83	40	42	25	52	24	47	41	51	26	27	26	53	36	129		0	0	0	0	0	2	1	0
>miR393	AT3G23690	8531019	8528639	2380		25	35	12	9	26	95	81	105	51	29	101	9	9	73	12	90	73		25	35	12	9	26	95	81	105	51	29	101	9	9	73	12	90	73		0	0	0	0	0	2	5	3
>miR393	AT3G26810	9869082	9871877	2795		63	53	39	34	19	9	9	2	29	24	6	1	5	10	6	32	2		63	53	39	34	19	9	9	2	29	24	6	0	5	10	6	32	2		0	0	0	0	0	1	3	0
>miR393	AT3G62980	23287350	23284091	3259		95	126	146	132	113	80	143	83	87	63	24	23	45	40	14	64	100		95	126	146	132	113	80	143	83	87	63	24	23	45	40	14	64	100		0	0	0	0	0	1	5	3
>miR393	AT4G03190	1407139	1404887	2252		53	76	18	37	33	28	58	37	30	44	17	9	1	51	8	130	85		53	76	18	37	33	28	58	37	30	44	17	9	0	51	8	130	85		0	0	5	0	0	0	0	2
>miR394	AT1G27340	9495507	9498072	2565		31	66	42	30	50	7	8	5	11	48	3	5	2	3	4	36	22		31	66	42	30	50	7	8	5	11	48	3	5	2	3	4	36	22		1	0	0	0	0	0	0	0
>miR395	AT5G43780	17608762	17606621	2141		46	8	25	28	28	11	20	41	14	432	9	82	193	79	137	315	174		46	8	25	28	28	11	20	41	14	432	9	82	193	79	137	315	174		0	0	6	10	0	3	0	0
>miR395	AT3G22890	8112730	8114997	2267		610	66	243	120	54	359	319	195	275	742	173	802	1192	1773	341	1291	304		610	66	243	120	54	359	319	195	275	742	173	802	1192	1773	341	1291	304		3	0	13	0	1	5	9	2
>miR396	AT2G22840	9735836	9738381	2545		1	37	16	52	17	37	72	7	3	110	1	10	1	5	41	14	3		0	37	16	52	17	37	72	7	3	110	0	10	0	5	41	14	3		0	0	4	0	0	3	15	0
>miR396	AT2G36400	15279902	15277167	2735		1	24	12	42	1	40	94	18	47	74	21	1	1	11	41	1	1		0	24	12	42	0	40	94	18	47	74	21	1	0	11	41	0	0		2	0	1	0	0	0	0	0
>miR396	AT2G45480	18752414	18754607	2193		1	1	1	1	1	2	6	1	4	1	1	1	1	1	1	1	1		0	1	0	0	0	2	6	0	4	0	0	0	0	0	0	0	0		0	0	0	0	0	0	0	0
>miR396	AT4G24150	12535982	12539397	3415		12	2	1	1	5	6	1	6	6	1	1	1	1	2	1	1	26		12	2	0	0	5	6	0	6	6	0	0	0	0	2	0	0	26		0	0	0	0	0	0	0	0
>miR396	AT4G37740	17727724	17725331	2393		7	8	7	22	1	18	9	1	12	23	6	1	1	10	1	6	1		7	8	7	22	0	18	9	1	12	23	6	0	0	10	0	6	0		0	0	0	0	0	0	5	0
>miR396	AT5G53660	21811762	21813272	1510		1	22	1	1	1	2	6	8	2	1	21	1	1	1	1	1	1		0	22	0	0	0	2	6	8	2	0	21	0	0	0	0	0	0		0	0	0	0	0	0	0	0
>miR397	AT2G29130	12534776	12531966	2810		1	1	3	90	4	5	1	7	1	14	1	1	1	11	1	1	22		0	0	3	90	4	5	0	7	0	14	0	0	0	11	0	0	22		0	0	0	0	0	0	0	0
>miR397	AT2G38080	15941538	15944694	3156		1	300	9	73	87	157	31	47	361	85	251	1	10	24	5	1	74		0	300	9	73	87	157	31	47	361	85	251	0	10	24	5	0	74		0	0	0	4	0	0	0	0
>miR397	AT5G60020	24185222	24187688	2466		1	131	3	51	36	8	7	6	24	1	17	15	1	1	1	1	47		0	131	3	51	36	8	7	6	24	0	17	15	0	1	0	0	47		0	0	0	0	0	3	0	3
>miR398	AT3G15640	5299117	5301752	2635		2	1	8	1	47	4	7	1	36	4	12	1	1	1	19	14	35		2	0	8	0	47	4	7	0	36	4	12	0	0	1	19	14	35		0	15	5	44	5	2	8	5
>miR398	AT1G08830	2827064	2829318	2254		181	264	65	62	175	275	726	230	563	260	556	56	45	19	33	179	370		181	264	65	62	175	275	726	230	563	260	556	56	45	19	33	179	370		0	0	3	2	0	9	5	3
>miR398	AT2G28190	12021575	12023646	2071		102	671	440	328	693	142	486	385	493	99	358	9	30	14	4	31	412		102	671	440	328	693	142	486	385	493	99	358	9	30	14	4	31	412		0	4	4	13	8	14	19	0
>miR399	AT2G33770	14290116	14284634	5482		285	153	50	52	23	26	20	16	80	108	4	4	5	99	33	1501	25		285	153	50	52	23	26	20	16	80	108	4	4	5	99	33	1501	25		0	2	0	0	0	4	0	1
>miR403	AT1G31280	11181692	11185325	3633		9	2	1	1	1	5	4	5	13	7	5	1	45	1	1	14	1		9	2	0	0	0	5	4	5	13	7	5	0	45	0	0	14	0		0	0	0	0	0	0	0	0
>miR447	AT5G60760	24455497	24459513	4016		40	8	1	57	2	4	1	1	7	1	1	1	1	1	1	1	1		40	8	0	57	2	4	0	0	7	1	0	0	0	0	0	0	0		0	0	0	0	0	0	0	0
>miR472	AT1G51480	19097974	19094515	3459		1	1	1	1	1	1	1	1	1	1	1	1	1	1	1	1	1		0	0	0	0	0	0	0	0	0	0	0	0	0	0	0	0	0		0	0	0	0	0	0	0	0
>miR472	AT5G43740	17581965	17586029	4064		1	1	1	1	1	2	1	1	1	1	1	1	1	4	1	1	1		0	0	1	0	0	2	0	0	1	0	0	0	0	4	0	0	0		0	0	0	0	0	0	0	0
>miR773	AT4G14140	8146340	8152126	5786		1	1	1	1	1	1	1	1	1	1	1	1	1	1	1	1	1		0	0	0	0	0	0	0	0	0	0	0	0	0	0	0	0	0		0	0	0	0	0	0	0	0
>miR774	AT3G19890	6916148	6914916	1232		1	1	1	1	1	1	1	1	1	1	1	1	1	1	1	1	1		0	0	0	0	0	0	0	0	0	0	0	0	0	0	0	0	0		0	0	0	0	0	0	0	0
>miR775	AT1G53290	19874967	19877158	2191		11	30	22	6	23	10	14	11	10	9	11	1	1	3	1	17	6		11	30	22	6	23	10	14	11	10	9	11	0	0	3	0	17	6		0	0	0	0	0	0	0	0
>miR778	AT2G22740	9674061	9669718	4343		1	1	3	3	1	1	1	1	1	2	1	1	1	4	1	1	1		0	0	3	3	0	0	0	0	0	2	0	0	0	4	0	0	0		0	0	0	0	0	0	0	0
>miR780	AT5G41610	16658956	16655598	3358		13	6	1	1	6	3	8	5	8	10	5	1	1	3	1	164	55		13	6	1	0	6	3	8	5	8	10	5	0	0	3	0	164	55		0	2	5	0	0	1	0	0
>miR823	AT1G69770	26257248	26251981	5267		18	40	17	37	19	56	63	40	24	67	99	1	1	43	2	43	17		18	40	17	37	19	56	63	40	24	67	99	0	0	43	2	43	17		4	0	0	0	0	0	3	0
>miR824	AT3G57230	21188689	21191911	3222		68	16	27	31	89	5	5	2	2	29	10	2	1	7	3	75	40		68	16	27	31	89	5	5	2	2	29	10	2	1	7	3	75	40		2	0	5	5	0	0	3	0
>miR827	AT1G02860	635144	637262	2118		53	4	19	16	4	2	17	2	1	15	3	1	1	32	1	32	8		53	4	19	16	4	2	17	2	0	15	3	0	0	32	0	32	8		0	0	0	0	0	0	0	0
>miR828	AT1G66370	24757297	24758267	970		1	1	1	1	1	1	1	1	1	1	1	1	1	1	1	1	1		0	0	0	0	0	0	0	0	0	0	0	0	0	0	0	0	0		0	0	0	0	0	0	0	0
>miR842	AT5G38550	15453004	15450011	2993		1	1	1	1	1	1	1	1	1	1	1	1	1	1	1	1	1		0	0	0	0	0	0	0	0	0	0	0	0	0	0	0	0	0		0	0	0	0	0	0	0	0
>miR844	AT5G51270	20855488	20852363	3125		1	1	1	1	1	2	4	1	1	1	1	1	1	1	1	1	1		0	0	0	0	0	2	4	0	0	0	0	0	0	0	0	0	0		0	0	0	0	0	0	0	0
>miR846	AT5G49850	20279811	20277134	2677		136	1	1	1	1	1	1	1	1	1	1	1	1	1	1	19	1		136	0	0	0	0	0	0	0	0	0	0	0	0	0	0	19	0		3	0	0	0	0	0	0	0
>miR857	AT3G09220	2830548	2827245	3303		1	1	1	1	1	1	1	1	1	1	1	1	1	1	4	1	1		0	0	0	0	0	0	0	0	0	0	0	0	0	0	4	0	0		0	0	0	1	0	0	0	0
>miR858	AT2G47460	19483407	19486548	3141		1	29	1	8	2	4	11	4	2	1	8	1	1	1	1	13	1		0	29	0	8	2	4	11	4	2	0	8	0	0	0	1	13	0		0	0	0	0	0	0	0	0
>miR858	AT3G08500	2578252	2576800	1452		1	9	1	1	6	1	1	1	1	1	1	1	1	1	1	1	1		0	9	0	1	6	0	0	0	0	0	0	0	0	0	0	0	0		0	0	0	0	0	0	0	0
>miR859	AT3G49510	18364827	18367493	2666		9	5	3	1	9	6	1	1	1	1	13	1	1	1	1	1	1		9	5	3	0	9	6	0	0	0	0	13	0	0	1	0	0	0		0	0	0	0	0	0	0	0
Note: In the statistical analysis, if a gene had no sense expression, a transcripts-per-million value of 1 was given to avoid division by zero in calculating the percentage of antisense expression as a fraction of total expression.
																				Average signature value
																					validated			CAF	INF	LEF	ROF	SIF	AP1	AP3	AGM	INS	ROS	SAP	S04	S52	LES	GSE	CAS	SIS		Combined
																						sense		31.3511	41.2979	22.2553	22.3936	30.9149	27.6915	42.6277	30.3404	40.8298	32.766	30.6702	15.3298	19.8617	32.0532	11.9574	55.7766	35.4255		31.2775
																						antisense		0.0210261	0.0209818	0.0474838	0.0410048	0.0249618	0.0750723	0.0705047	0.0541989	0.0648853	0.060051	0.0662833	0.033902	0.0356768	0.0698969	0.14799	0.0164544	0.0212184		0.0596778
																								CAF	INF	LEF	ROF	SIF	AP1	AP3	AGM	INS	ROS	SAP	S04	S52	LES	GSE	CAS	SIS
																					predicted	sense		17.2297	18.5336	14.4841	20.6855	17.3004	8.63251	12.7597	11.689	11.7456	16.1201	10.477	4.21201	6.36042	10.0177	8.40989	18.0212	15.0495		11.1246
																						antisense		0.023444	0.008188	0.021184	0.019016	0.014396	0.033662	0.020974	0.021828	0.029616	0.024899	0.03361	0.021388	0.019182	0.025324	0.059394	0.017765	0.014585		0.0268522
																					paralog			CAF	INF	LEF	ROF	SIF	AP1	AP3	AGM	INS	ROS	SAP	S04	S52	LES	GSE	CAS	SIS
																						sense		23.7914	24.1439	16.5108	18.2374	15.9209	18.2014	19.2014	16.0216	19.9137	16.1439	16.1583	4.28777	5.66906	13.1727	5.1295	19.0935	15.187		14.015
																						antisense		0.027273	0.045106	0.025023	0.049729	0.027126	0.057084	0.058507	0.033404	0.028664	0.05206	0.049421	0.025537	0.034017	0.040454	0.124388	0.010457	0.008154		0.0435123
																				t-test all libraries				sense	antisense
																						validated/paralog		1.39994e-08	0.00685497
																								high	high
																						validated/predicted		2.763e-18	2.07131e-11
																								high	high
																						predicted/paralog		0.0109647	4.03073e-05
																								low	low
																				t-test each library individually		validated/paralog		CAF	INF	LEF	ROF	SIF	AP1	AP3	AGM	INS	ROS	SAP	S04	S52	LES	GSE	CAS	SIS
																						sense		0.18234	0.0608344	0.183204	0.232322	0.0353914	0.139712	0.0269909	0.0481403	0.0264024	0.0258503	0.0479197	0.0674745	0.0930002	0.118416	0.0344154	0.02098	0.0052864
																								same	same	same	same	high	same	high	high	high	high	high	same	same	same	high	high	high
																						antisense		0.345934	0.135483	0.107332	0.352039	0.449027	0.213816	0.3085	0.165659	0.0263762	0.369561	0.231959	0.332367	0.468042	0.099575	0.269019	0.243765	0.16588
																								same	same	same	same	same	same	same	same	high	same	same	same	same	same	same	same	same
																						validated/predicted
																						sense		0.0192624	0.00289652	0.0819902	0.405058	0.0496512	0.000182624	0.000212389	0.00164003	5.65129e-05	0.015671	0.000647401	0.0166017	0.0463796	0.0246795	0.238257	0.00344978	0.00151848
																								high	high	same	same	high	high	high	high	high	high	high	high	high	high	same	high	high
																						antisense		0.430709	0.107606	0.0422465	0.0655119	0.201446	0.00735734	0.000738599	0.0238058	0.0210011	0.0153434	0.0372956	0.213107	0.139802	0.00510354	0.00045446	0.458813	0.308689
																								same	same	high	same	same	high	high	high	high	high	high	same	same	high	high	same	same
																						predicted/paralog
																						sense		0.10573	0.195082	0.323315	0.341471	0.410286	0.0114375	0.115486	0.188673	0.0547788	0.497995	0.083487	0.481133	0.401659	0.146581	0.187254	0.428485	0.488724
																								same	same	same	same	same	low	same	same	same	same	same	same	same	same	same	same	same
																						antisense		0.385301	0.0803297	0.451045	0.0402436	0.390919	0.0115177	0.0104218	0.225607	0.333336	0.0276558	0.0375493	0.437381	0.223176	0.103809	2.64925e-07	0.119629	0.0937472
																								same	same	same	low	same	low	low	same	same	low	low	same	same	same	low	same	same
[truncated: 26 more columns]

## Sheet: Predicted targets
						Normalized abundance for MPSS mRNA sense signatures (replace 0 by 1)																		Abundance for MPSS mRNA sense signatures-raw data																		Abundance for MPSS mRNA antisense signatures-raw data
miRNA	Target	5' End	3' End	Len (bp)		CAF	INF	LEF	ROF	SIF	AP1	AP3	AGM	INS	ROS	SAP	S04	S52	LES	GSE	CAS	SIS		CAF	INF	LEF	ROF	SIF	AP1	AP3	AGM	INS	ROS	SAP	S04	S52	LES	GSE	CAS	SIS		CAF	INF	LEF	ROF	SIF	AP1	AP3	AGM
>miR156	AT1G69170	26008731	26010926	2195		9	5	1	4	12	2	2	1	2	7	1	1	1	1	1	7	1		9	5	0	4	12	2	2	0	2	7	0	0	0	0	0	7	0		0	0	0	0	0	0	0	0
>miR156	AT2G42200	17594485	17596708	2223		1	117	4	1	1	20	64	80	56	2	39	1	1	4	5	7	1		0	117	4	1	0	20	64	80	56	2	39	0	0	4	5	7	0		0	0	0	0	0	10	2	7
>miR156	AT3G15270	5141353	5140372	981		1	198	1	1	1	28	16	25	37	1	35	4	1	1	1	1	3		0	198	0	0	0	28	16	25	37	0	35	4	0	0	0	0	3		0	0	0	0	0	0	0	0
>miR156	AT3G57920	21457012	21455298	1714		1	31	3	3	5	10	45	5	10	7	1	1	1	1	1	1	1		0	31	3	3	5	10	45	5	10	7	0	0	0	0	0	0	0		0	0	0	0	0	0	0	0
>miR156	AT5G50570	20601785	20599309	2476		1	1	1	1	1	1	1	1	1	1	1	1	1	1	1	1	1		0	0	0	0	0	0	0	0	0	0	0	0	0	0	0	0	0		0	0	0	0	0	0	0	0
>miR156	AT5G50670	20635065	20632930	2135		1	1	1	1	1	1	1	1	1	1	1	1	1	1	1	1	1		0	0	0	0	0	0	0	0	0	0	0	0	0	0	0	0	0		0	0	0	0	0	0	0	0
>miR158	AT1G64100	23795248	23799226	3978		1	8	1	1	1	1	1	1	1	1	1	1	1	1	1	1	1		0	8	0	0	0	0	0	0	0	0	0	0	0	0	0	0	0		0	0	0	0	0	0	0	0
>miR158	AT3G03580	863359	860519	2840		3	1	3	9	1	2	6	4	2	1	24	1	1	1	1	1	1		3	0	3	9	0	2	6	4	2	0	24	0	0	0	0	0	0		0	0	0	0	0	0	0	0
>miR158	AT1G22000	7744178	7747112	2934		1	1	1	1	1	1	1	1	1	1	1	1	1	1	1	1	1		0	0	0	0	0	0	0	0	0	0	0	0	0	0	0	0	0		0	0	0	0	0	0	0	0
>miR158	AT3G47170	17381479	17379657	1822		1	1	1	1	1	1	1	1	1	1	1	1	1	1	1	1	1		0	0	0	0	0	0	0	0	0	0	0	0	0	0	0	0	0		0	200	0	0	0	14	26	35
>miR159	AT1G30210	10630594	10627169	3425		1	1	1	1	1	1	4	1	1	1	1	1	1	4	1	2	1		0	0	0	0	0	0	4	0	0	0	0	0	0	4	0	2	0		0	0	0	0	0	0	0	0
>miR159	AT1G53230	19855393	19853456	1937		3	57	65	13	106	18	15	108	33	6	66	22	19	50	8	2	59		3	57	65	13	106	18	15	108	33	6	66	22	19	50	8	2	59		0	0	2	0	0	0	3	0
>miR159	AT2G26950	11509154	11507907	1247		1	1	1	1	1	1	1	1	1	1	1	1	1	1	1	1	1		0	0	0	0	0	0	0	0	0	0	0	0	0	0	0	0	0		0	0	0	0	0	0	0	0
>miR159	AT2G31070	13229686	13227555	2131		15	16	69	1	18	1	8	17	8	1	1	1	1	28	1	1	3		15	16	69	0	18	1	8	17	8	0	0	0	0	28	0	0	3		0	2	0	0	0	4	2	0
>miR159	AT2G32460	13791548	13789285	2263		2	28	1	1	24	37	1	1	8	1	15	1	1	1	1	1	1		2	28	0	0	24	37	0	0	8	0	15	0	0	0	0	0	0		0	0	0	0	0	0	0	0
>miR159	AT3G15030	5062026	5064122	2096		1	3	2	1	1	17	18	93	62	1	3	25	19	6	1	1	26		0	3	2	0	0	17	18	93	62	0	3	25	19	6	0	0	26		0	0	0	0	0	0	0	0
>miR159	AT3G60460	22354466	22353404	1062		1	1	1	1	1	1	3	1	4	1	1	1	1	1	1	29	1		0	0	0	0	0	0	3	0	4	0	0	0	1	0	0	29	0		0	0	0	0	0	0	0	0
>miR159	AT4G18390	10165573	10162964	2609		1	1	1	1	1	1	1	1	1	1	1	1	1	1	1	1	1		0	0	0	0	0	0	0	0	0	0	0	0	0	0	0	0	0		1	0	5	0	3	1	0	0
>miR159	AT4G26930	13527776	13529178	1402		1	1	1	1	1	1	1	1	1	1	1	1	1	1	1	1	1		0	0	0	0	0	0	0	0	0	0	0	0	0	0	0	0	0		0	0	0	0	0	0	0	0
>miR159	AT5G55020	22343474	22341825	1649		1	1	1	1	1	1	1	1	1	1	1	1	1	1	1	1	1		0	0	0	0	0	0	0	0	0	0	0	0	0	0	0	0	0		0	0	0	0	0	0	0	0
>miR161	AT1G62590	23182913	23180595	2318		5	10	27	11	9	2	5	8	5	3	1	2	1	4	1	14	21		5	10	27	11	9	2	5	8	5	3	0	2	0	4	0	14	21		0	0	0	0	0	0	0	0
>miR161	AT1G62670	23210330	23208438	1892		1	5	2	1	8	1	1	1	1	5	6	1	1	1	1	1	1		0	5	2	0	8	0	0	0	0	5	6	0	0	0	0	0	0		0	0	0	0	0	0	0	0
>miR161	AT1G62860	23280142	23278341	1801		14	1	8	11	6	3	5	1	4	1	1	1	1	1	1	1	1		14	0	8	11	6	3	5	0	4	0	0	0	0	0	0	0	0		0	0	0	0	0	4	0	4
>miR161	AT1G62910	23302722	23306827	4105		1	1	1	1	1	1	1	4	1	1	1	1	1	1	1	1	1		0	0	0	0	0	0	0	4	0	0	0	0	0	0	0	0	0		0	0	0	0	0	0	0	0
>miR161	AT1G62930	23310199	23312348	2149		1	1	1	1	1	1	1	1	1	1	1	1	1	1	1	1	1		0	0	0	0	0	0	0	0	0	0	0	0	0	0	0	0	0		0	0	0	0	0	0	0	0
>miR161	AT1G63070	23390832	23388989	1843		1	1	1	1	1	1	1	1	1	1	1	1	1	1	1	1	1		0	0	0	0	0	0	0	0	0	0	0	0	0	0	0	0	0		0	0	0	0	0	0	0	0
>miR161	AT1G63080	23394481	23391296	3185		1	1	3	3	4	1	1	1	1	13	1	1	1	1	4	1	9		0	0	3	3	4	0	0	0	0	13	0	0	0	0	4	0	9		0	0	0	0	0	0	0	0
>miR161	AT1G63130	23416395	23418814	2419		7	14	18	33	24	11	8	1	12	11	3	1	1	3	1	1	1		7	14	18	33	24	11	8	0	12	11	3	0	0	3	0	0	0		0	0	0	0	0	0	0	0
>miR161	AT1G63150	23423061	23425244	2183		13	1	1	1	5	5	8	2	7	1	2	1	17	2	1	4	1		13	0	0	0	5	5	8	2	7	0	2	0	17	2	0	4	0		0	0	0	0	0	0	0	0
>miR161	AT1G63230	23454319	23455976	1657		1	2	2	30	4	1	1	1	6	1	1	1	1	1	1	4	4		0	2	2	30	4	0	0	0	6	0	0	0	0	0	0	4	4		0	0	0	0	0	0	0	0
>miR161	AT1G63330	23493293	23495184	1891		1	1	1	1	1	1	1	1	1	1	1	1	1	1	1	1	1		0	0	0	0	0	0	0	0	0	0	0	0	0	0	0	0	0		0	0	0	0	0	0	0	0
>miR161	AT1G63400	23510985	23512718	1733		1	1	1	1	1	1	1	1	1	1	1	1	1	1	1	1	1		0	0	0	0	0	0	0	0	0	0	0	0	0	0	0	0	0		0	0	0	0	0	0	0	0
>miR161	AT1G64580	23992412	23988741	3671		22	15	10	9	16	4	1	1	1	7	1	1	1	1	1	1	1		22	15	10	9	16	4	0	0	0	7	0	0	0	0	0	0	0		0	0	0	0	0	0	0	0
>miR161	AT2G41720	17414213	17410681	3532		2	13	16	2	23	2	5	3	4	17	9	2	1	2	5	1	7		2	13	16	2	23	2	5	3	4	17	9	2	0	2	5	0	7		0	0	0	0	0	0	0	0
>miR161	AT3G16710	5690245	5691549	1304		1	5	1	3	4	1	3	1	1	1	1	1	1	1	6	1	12		0	5	0	3	4	0	3	0	0	0	0	0	0	1	6	0	12		0	0	0	0	0	0	0	0
>miR161	AT4G26800	13489841	13492060	2219		1	1	1	2	1	1	1	2	1	1	1	1	1	1	1	5	1		0	0	0	2	0	0	0	2	0	0	0	0	0	0	0	5	0		0	0	0	0	0	0	0	0
>miR161	AT5G16640	5460979	5463020	2041		1	1	1	1	1	1	1	1	1	1	1	1	1	1	1	1	1		0	0	0	0	0	0	0	0	0	0	0	0	0	0	0	0	0		0	0	0	0	0	0	0	0
>miR161	AT5G41170	16497812	16495714	2098		1	1	1	1	1	1	1	1	1	1	1	1	1	1	1	1	1		0	0	0	0	0	0	0	0	0	0	0	0	0	0	0	0	0		0	0	0	0	0	0	0	0
>miR161	AT5G65560	26221004	26218238	2766		1	1	1	1	1	1	1	1	1	1	1	1	1	1	1	1	1		0	0	0	0	0	0	0	0	0	0	0	0	0	0	0	0	0		0	0	0	0	0	0	0	0
>miR161	AT1G62720	23231197	23232815	1618		1	1	1	1	1	1	3	1	4	1	1	1	1	1	1	4	1		0	0	0	0	0	0	3	0	4	0	0	0	0	0	0	4	0		0	0	0	0	0	0	0	0
>miR164	AT3G12977	4143836	4145974	2138		1	1	1	30	1	1	1	1	1	1	1	1	1	1	1	1	1		0	0	0	30	0	0	0	0	0	0	0	0	0	0	0	0	0		0	0	0	0	0	0	0	0
>miR164	AT5G39610	15877016	15875628	1388		72	4	82	17	1	1	1	2	4	25	4	5	2	18	1	197	1		72	4	82	17	0	0	0	2	4	25	4	5	2	18	0	197	0		2	0	5	2	0	0	0	0
>miR169	AT3G20910	7326388	7328580	2192		22	18	6	1	2	7	5	6	1	1	16	18	1	54	28	21	16		22	18	6	0	2	7	5	6	1	0	16	18	1	54	28	21	16		0	0	0	0	0	0	0	0
>miR169	AT5G12840	4053605	4050694	2911		4	6	1	1	1	4	6	27	7	1	6	3	7	20	9	30	1		4	6	1	0	0	4	6	27	7	0	6	3	7	20	9	30	0		0	0	0	0	0	0	0	0
>miR169	AT3G14020	4642975	4644308	1333		3	15	7	3	2	1	1	1	1	1	1	2	1	1	1	1	1		3	15	7	3	2	0	0	0	0	0	0	2	1	0	0	1	0		0	0	0	0	0	0	0	0
>miR170	AT2G45160	18627225	18624937	2288		62	49	43	58	17	42	51	40	58	39	18	15	8	17	54	82	127		62	49	43	58	17	42	51	40	58	39	18	15	8	17	54	82	127		0	0	0	2	0	2	0	0
>miR170	AT3G60630	22423583	22421340	2243		22	90	25	60	78	5	4	6	4	1	16	1	1	1	26	7	2		22	90	25	60	78	5	4	6	4	0	16	0	0	0	26	7	2		0	0	0	0	0	1	0	0
>miR170	AT4G00150	59286	57199	2087		13	7	10	10	1	1	7	1	4	1	1	1	1	1	1	1	3		13	7	10	10	0	0	7	0	4	0	0	0	0	0	0	0	3		2	0	0	0	0	1	0	0
>miR172	AT2G39250	16398151	16395964	2187		1	1	11	1	1	1	1	1	1	1	1	1	1	1	1	1	1		0	0	11	0	0	0	0	0	0	0	0	0	0	0	0	0	0		0	0	0	0	0	0	0	0
>miR172	AT3G54990	20387499	20384695	2804		13	4	40	30	1	1	1	1	1	3	38	1	1	1	1	16	1		13	4	40	30	0	0	0	0	0	3	38	1	0	0	1	16	0		0	0	0	0	0	0	0	0
>miR172	AT4G39620	18395288	18397572	2284		1	1	1	1	1	1	1	1	1	1	1	1	1	1	1	1	1		0	0	0	0	0	0	0	0	0	0	0	0	0	0	0	0	0		0	0	0	0	0	5	0	0
>miR395	AT4G14680	8415386	8413283	2103		63	23	43	25	8	11	33	8	11	12	4	1	4	63	9	58	49		63	23	43	25	8	11	33	8	11	12	4	0	4	63	9	58	49		0	0	0	0	0	0	0	0
>miR395	AT5G10180	3193145	3197121	3976		103	1	89	27	44	1	7	12	2	12	1	36	6	81	8	116	193		103	0	89	27	44	0	7	12	2	12	0	36	6	81	8	116	193		0	0	0	3	0	0	0	0
>miR396	AT3G52910	19629427	19626999	2428		1	41	3	6	30	4	18	2	14	20	4	1	1	1	31	1	1		0	41	3	6	30	4	18	2	14	20	4	0	0	0	31	0	0		0	0	0	0	0	0	0	0
>miR396	AT2G40760	17017126	17019145	2019		141	163	72	187	106	62	127	128	71	311	122	22	70	53	24	212	176		141	163	72	187	106	62	127	128	71	311	122	22	70	53	24	212	176		0	0	0	0	0	0	0	0
>miR396	AT4G27180	13619162	13614866	4296		51	179	15	59	73	13	52	49	35	65	18	29	1	39	3	34	27		51	179	15	59	73	13	52	49	35	65	18	29	0	39	3	34	27		0	0	0	3	0	0	0	17
>miR397	AT3G60250	22283088	22281317	1771		5	1	1	1	5	1	1	5	5	1	1	1	1	17	1	1	1		5	1	0	0	5	1	1	5	5	0	0	0	0	17	0	0	0		0	0	0	8	0	0	0	0
>miR397	AT5G12250	3963523	3961107	2416		98	401	366	554	561	75	183	271	215	263	228	146	34	187	74	83	246		98	401	366	554	561	75	183	271	215	263	228	146	34	187	74	83	246		0	0	17	13	13	16	14	5
>miR398	AT2G28190	12021575	12023646	2071		102	671	440	328	693	142	486	385	493	99	358	9	30	14	4	31	412		102	671	440	328	693	142	486	385	493	99	358	9	30	14	4	31	412		0	4	4	13	8	14	19	0
>miR400	AT1G06580	2016053	2014002	2051		1	1	1	1	2	1	1	1	1	1	3	1	1	7	1	1	1		0	0	0	0	2	0	0	0	0	0	3	0	0	7	0	0	0		0	0	0	0	0	0	0	0
>miR400	AT1G22960	8130231	8128075	2156		15	22	26	34	6	1	10	1	3	7	20	1	6	4	1	52	29		15	22	26	34	6	0	10	0	3	7	20	0	6	4	0	52	29		0	0	0	0	0	0	0	0
>miR400	AT1G62590	23182913	23180595	2318		5	10	27	11	9	2	5	8	5	3	1	2	1	4	1	14	21		5	10	27	11	9	2	5	8	5	3	0	2	0	4	0	14	21		0	0	0	0	0	0	0	0
>miR400	AT1G62670	23210330	23208438	1892		1	5	2	1	8	1	1	1	1	5	6	1	1	1	1	1	1		0	5	2	0	8	0	0	0	0	5	6	0	0	0	0	0	0		0	0	0	0	0	0	0	0
>miR400	AT1G62720	23231197	23232815	1618		1	1	1	1	1	1	3	1	4	1	1	1	1	1	1	4	1		0	0	0	0	0	0	3	0	4	0	0	0	0	0	0	4	0		0	0	0	0	0	0	0	0
>miR400	AT1G62910	23302722	23306827	4105		1	1	1	1	1	1	1	4	1	1	1	1	1	1	1	1	1		0	0	0	0	0	0	0	4	0	0	0	0	0	0	0	0	0		0	0	0	0	0	0	0	0
>miR400	AT1G62930	23310199	23312348	2149		1	1	1	1	1	1	1	1	1	1	1	1	1	1	1	1	1		0	0	0	0	0	0	0	0	0	0	0	0	0	0	0	0	0		0	0	0	0	0	0	0	0
>miR400	AT1G63070	23390832	23388989	1843		1	1	1	1	1	1	1	1	1	1	1	1	1	1	1	1	1		0	0	0	0	0	0	0	0	0	0	0	0	0	0	0	0	0		0	0	0	0	0	0	0	0
>miR400	AT1G63080	23394481	23391296	3185		1	1	3	3	4	1	1	1	1	13	1	1	1	1	4	1	9		0	0	3	3	4	0	0	0	0	13	0	0	0	0	4	0	9		0	0	0	0	0	0	0	0
>miR400	AT1G63130	23416395	23418814	2419		7	14	18	33	24	11	8	1	12	11	3	1	1	3	1	1	1		7	14	18	33	24	11	8	0	12	11	3	0	0	3	0	0	0		0	0	0	0	0	0	0	0
>miR400	AT1G63330	23493293	23495184	1891		1	1	1	1	1	1	1	1	1	1	1	1	1	1	1	1	1		0	0	0	0	0	0	0	0	0	0	0	0	0	0	0	0	0		0	0	0	0	0	0	0	0
>miR400	AT1G63400	23510985	23512718	1733		1	1	1	1	1	1	1	1	1	1	1	1	1	1	1	1	1		0	0	0	0	0	0	0	0	0	0	0	0	0	0	0	0	0		0	0	0	0	0	0	0	0
>miR400	AT1G64580	23992412	23988741	3671		22	15	10	9	16	4	1	1	1	7	1	1	1	1	1	1	1		22	15	10	9	16	4	0	0	0	7	0	0	0	0	0	0	0		0	0	0	0	0	0	0	0
>miR400	AT3G16710	5690245	5691549	1304		1	5	1	3	4	1	3	1	1	1	1	1	1	1	6	1	12		0	5	0	3	4	0	3	0	0	0	0	0	0	1	6	0	12		0	0	0	0	0	0	0	0
>miR400	AT3G22470	7967997	7965961	2036		5	34	7	1	34	1	1	1	1	1	1	1	1	1	1	1	1		5	34	7	1	34	0	0	0	0	0	0	0	0	0	0	0	0		0	0	0	0	0	0	0	0
>miR400	AT4G19440	10604531	10600801	3730		1	1	1	1	2	6	1	1	1	5	1	1	1	19	1	39	2		0	0	0	0	2	6	0	0	0	5	0	1	0	19	1	39	2		0	0	0	0	0	0	0	0
>miR400	AT5G16640	5460979	5463020	2041		1	1	1	1	1	1	1	1	1	1	1	1	1	1	1	1	1		0	0	0	0	0	0	0	0	0	0	0	0	0	0	0	0	0		0	0	0	0	0	0	0	0
>miR400	AT5G39710	15912957	15915200	2243		10	16	33	18	5	9	4	4	2	1	1	1	5	2	5	2	3		10	16	33	18	5	9	4	4	2	0	0	0	5	2	5	2	3		0	0	0	0	0	0	0	0
>miR400	AT5G46680	18958196	18959829	1633		1	1	1	1	1	1	1	1	1	1	1	1	1	1	1	1	1		0	0	0	0	0	0	0	0	0	0	0	0	0	0	0	0	0		0	0	0	0	0	0	0	0
>miR400	AT1G20300	7029619	7031525	1906		1	1	3	1	1	11	1	7	5	1	29	3	1	26	16	43	11		0	0	3	0	0	11	0	7	5	0	29	3	0	26	16	43	11		0	0	0	0	0	0	0	0
>miR400	AT2G31400	13397783	13394081	3702		311	110	98	92	150	10	15	16	6	10	28	17	13	15	72	3	6		311	110	98	92	150	10	15	16	6	10	28	17	13	15	72	3	6		2	0	0	1	1	4	15	4
>miR400	AT3G16910	5775507	5773061	2446		15	24	16	1	4	25	21	22	74	51	2	42	66	100	36	158	90		15	24	16	0	4	25	21	22	74	51	2	42	66	100	36	158	90		0	0	0	0	0	0	0	0
>miR401	AT2G06095	2373775	2374525	750		1	1	1	1	1	1	1	1	1	1	1	1	1	1	1	1	1		0	0	0	0	0	0	0	0	0	0	0	0	0	0	0	0	0		0	0	0	0	0	0	0	0
>miR401	AT2G13270	5499735	5500937	1202		1	1	1	1	1	1	1	1	1	1	1	1	1	1	1	1	1		0	0	0	0	0	0	0	0	0	0	0	0	0	0	0	0	0		0	0	0	0	0	0	0	0
>miR401	AT3G42350	14503573	14500913	2660		1	1	1	1	1	1	1	1	1	1	1	1	1	1	1	1	1		0	0	0	0	0	0	0	0	0	0	0	0	0	0	0	0	0		0	0	0	0	0	0	0	0
>miR402	AT4G34060	16314008	16319431	5423		6	5	1	3	1	2	1	1	3	1	2	1	1	14	1	1	1		6	5	0	3	0	2	0	0	3	1	2	0	0	14	0	0	0		0	0	0	0	0	0	0	0
>miR404	AT1G07650	2366558	2359546	7012		15	59	47	6	25	42	53	16	31	17	56	6	29	47	1	16	99		15	59	47	6	25	42	53	16	31	17	56	6	29	47	0	16	99		0	0	0	0	0	0	22	0
>miR406	AT1G54380	20304575	20301632	2943		5	1	6	13	14	9	10	6	4	8	1	1	16	15	1	15	1		5	0	6	13	14	9	10	6	4	8	0	0	16	15	0	15	0		0	0	0	0	0	0	0	0
>miR406	AT2G42510	17708740	17711696	2956		1	1	1	1	1	1	1	1	1	1	1	1	1	1	1	1	1		0	0	0	0	0	0	0	0	0	0	0	0	0	0	0	0	0		0	0	0	0	0	0	0	0
>miR407	AT1G12010	4056205	4057931	1726		1	4	6	139	6	1	1	1	1	42	14	1	1	1	1	1	1		0	4	6	139	6	0	0	0	0	42	14	0	0	0	0	0	0		0	0	0	1	3	0	5	0
>miR407	AT1G17770	6120734	6122815	2081		1	1	1	1	1	1	1	1	1	1	1	1	1	1	1	1	1		0	0	0	0	0	0	0	0	0	0	0	0	0	0	0	0	0		0	0	0	0	0	0	0	0
>miR407	AT3G13100	4214180	4208742	5438		1	1	1	1	1	1	4	1	1	5	1	1	1	1	1	18	7		0	0	0	0	0	0	4	0	0	5	0	0	0	0	0	18	7		0	0	0	0	0	0	0	0
>miR407	AT5G49870	20289774	20287418	2356		1	1	1	1	1	1	1	1	1	1	1	1	1	1	1	1	1		0	0	0	0	0	0	0	0	0	0	0	0	0	0	0	0	0		0	0	0	0	0	0	0	0
>miR408	AT2G02850	827811	826403	1408		18	189	11	51	9	55	257	22	163	19	82	1	1	1	1	5	1		18	189	11	51	9	55	257	22	163	19	82	0	0	0	0	5	0		0	0	0	0	0	1	0	2
>miR408	AT2G30210	12896934	12894523	2411		1	1	4	192	1	1	1	1	1	75	1	1	1	1	1	1	1		0	0	4	192	0	0	0	0	0	75	0	0	0	0	0	0	0		0	0	0	0	0	0	0	0
>miR408	AT2G47020	19329461	19326755	2706		1	8	1	2	1	1	3	9	4	19	6	1	7	3	1	48	1		0	8	0	2	0	0	3	9	4	19	6	0	7	3	0	48	0		73	6	3	33	15	3	0	0
>miR408	AT5G05390	1594754	1597043	2289		1	1	4	10	25	1	1	1	1	1	1	1	1	1	1	1	1		0	0	4	10	25	0	0	0	0	0	0	0	0	1	0	0	0		0	0	0	0	0	0	0	0
>miR408	AT5G07130	2210570	2212621	2051		1	1	1	1	1	4	4	1	4	3	1	1	4	1	1	16	5		0	0	0	0	0	4	4	0	4	3	0	0	4	0	0	16	5		0	0	0	0	0	0	0	0
>miR414	AT1G15670	5389947	5391485	1538		261	111	94	219	3	104	31	67	49	423	26	30	273	139	334	814	49		261	111	94	219	3	104	31	67	49	423	26	30	273	139	334	814	49		5	0	2	0	0	0	0	0
>miR414	AT1G20920	7285048	7289767	4719		1	5	11	1	1	70	104	46	110	2	11	11	3	21	37	21	5		0	5	11	1	0	70	104	46	110	2	11	11	3	21	37	21	5		0	0	3	0	0	23	26	18
>miR414	AT2G44310	18316288	18316902	614		56	107	211	152	417	14	40	47	32	133	21	50	29	31	14	20	214		56	107	211	152	417	14	40	47	32	133	21	50	29	31	14	20	214		0	0	0	11	11	4	0	3
>miR414	AT3G42670	14771071	14766784	4287		42	26	13	14	6	3	30	14	11	25	31	2	8	8	1	11	1		42	26	13	14	6	3	30	14	11	25	31	2	8	8	0	11	0		0	0	0	0	0	0	0	0
>miR414	AT4G26110	13232604	13235888	3284		422	214	147	347	168	246	326	406	276	239	247	32	152	112	31	368	168		422	214	147	347	168	246	326	406	276	239	247	32	152	112	31	368	168		0	5	0	0	0	0	0	0
>miR419	AT2G01830	369706	362982	6724		14	64	5	130	8	68	8	1	1	32	12	1	1	47	43	1	1		14	64	5	130	8	68	8	0	0	32	12	0	0	47	43	0	0		2	0	0	3	0	0	5	3
>miR447	AT3G45090	16505747	16501585	4162		31	36	2	26	9	4	31	12	13	14	29	2	11	1	1	37	25		31	36	2	26	9	4	31	12	13	14	29	2	11	0	0	37	25		0	0	3	0	0	8	2	2
>miR391(3')	AT1G72000	27106939	27109325	2386		1	1	1	1	1	1	1	1	1	1	1	1	1	1	1	1	1		0	0	0	0	0	0	0	0	0	0	0	0	0	0	0	0	0		0	0	0	0	0	0	0	0
>miR472	AT1G12210	4140946	4143603	2657		1	1	1	1	6	1	1	1	1	8	7	1	3	1	1	8	1		0	0	0	0	6	1	1	0	0	8	7	0	3	0	0	8	0		0	0	0	0	0	0	0	2
>miR472	AT1G12220	4144933	4147815	2882		8	1	6	2	1	1	3	1	1	1	1	18	1	2	1	1	1		8	1	6	2	0	0	3	0	0	0	0	18	0	2	0	0	0		0	0	0	0	0	0	0	0
>miR472	AT1G12280	4177557	4174873	2684		1	1	1	1	1	1	1	1	4	1	1	1	25	10	1	1	1		0	0	0	0	0	0	0	0	4	0	0	0	25	10	0	0	0		0	0	0	0	0	0	0	0
>miR472	AT1G12290	4181245	4178591	2654		1	1	1	1	1	1	1	1	1	1	1	1	1	1	1	1	1		0	0	0	0	0	0	0	0	0	0	0	0	0	0	0	0	0		0	0	0	0	0	0	0	0
>miR472	AT1G15890	5461311	5464217	2906		2	1	4	12	1	1	1	1	1	9	1	1	1	1	1	1	1		2	0	4	12	0	0	0	0	0	9	0	0	0	0	0	0	0		0	0	0	0	0	0	0	0
>miR472	AT1G62630	23189577	23192258	2681		1	6	7	1	33	1	1	1	1	1	1	1	1	1	1	1	1		0	6	7	0	33	0	0	0	0	0	0	0	0	0	0	0	0		0	0	0	0	0	0	0	0
>miR472	AT1G63360	23505834	23503180	2654		1	4	15	1	5	3	2	6	1	1	5	1	8	2	16	1	1		0	4	15	0	5	3	2	6	0	0	5	0	8	2	16	0	0		0	0	0	0	0	0	0	0
>miR472	AT4G10780	6637453	6634775	2678		1	1	1	1	1	1	1	1	1	1	1	1	1	1	1	1	1		0	0	0	0	0	0	0	0	0	0	0	0	0	0	0	0	0		0	0	0	0	0	0	0	0
>miR472	AT4G27190	13623940	13620983	2957		1	1	1	1	1	1	1	1	1	1	1	1	1	1	1	1	1		0	0	0	0	0	0	0	0	0	0	0	0	0	0	0	0	0		4	0	0	0	0	0	0	0
>miR472	AT5G05400	1600370	1597746	2624		1	4	1	14	1	1	1	1	1	1	1	1	1	15	1	1	1		0	4	0	14	0	0	0	0	0	1	0	0	0	15	0	0	0		0	0	0	0	0	0	0	0
>miR472	AT5G43730	17577494	17580040	2546		1	1	1	3	1	1	1	2	1	31	2	1	1	1	1	26	34		0	0	0	3	0	0	0	2	0	31	2	0	0	0	0	26	34		0	0	0	0	0	0	0	0
>miR472	AT5G47260	19206638	19209295	2657		1	1	1	1	1	1	1	1	1	1	1	1	1	1	1	1	1		0	0	0	0	0	0	0	0	0	0	0	0	0	0	0	0	0		0	0	0	0	0	0	0	0
>miR472	AT5G63020	25303228	25300289	2939		15	15	28	14	3	7	4	7	2	3	3	1	13	11	1	3	4		15	15	28	14	3	7	4	7	2	3	3	0	13	11	1	3	4		0	0	0	0	0	0	0	0
>miR771	AT1G76810	28841480	28835900	5580		148	104	71	51	68	9	55	21	35	19	49	1	29	22	1	15	33		148	104	71	51	68	9	55	21	35	19	49	0	29	22	0	15	33		0	0	0	0	0	0	0	0
>miR772 (5')	AT2G28010	11938846	11937656	1190		1	1	1	1	1	1	1	1	1	1	1	1	1	1	1	1	1		0	0	0	0	0	0	0	0	0	0	0	0	0	0	0	0	0		0	0	0	0	0	0	0	0
>miR774	AT3G17265	5900643	5899521	1122		1	1	1	1	1	1	1	1	1	1	1	1	1	1	1	1	1		0	0	0	0	0	0	0	0	0	0	0	0	0	0	0	0	0		0	0	0	0	0	0	0	0
>miR774	AT3G17490	5984833	5985999	1166		1	1	1	1	1	1	1	1	1	1	1	1	1	1	1	1	1		0	0	0	0	0	0	0	0	0	0	0	0	0	0	0	0	0		0	0	0	0	0	0	0	0
>miR774	AT3G22700	8025821	8024805	1016		1	1	7	1	1	1	1	1	1	1	1	1	1	1	1	3	1		0	0	7	0	0	0	0	0	0	0	0	0	0	0	0	3	0		0	0	0	0	0	0	0	0
>miR774	AT3G22720	8030104	8028968	1136		1	1	1	1	1	1	1	1	1	1	1	1	1	1	1	1	1		0	0	0	0	0	0	0	0	0	0	0	0	0	0	0	0	0		0	0	0	0	0	0	0	0
>miR776	AT5G62310	25040581	25045640	5059		1	5	1	3	1	1	1	1	1	1	1	1	1	1	1	1	1		0	5	0	3	0	0	0	0	0	0	0	0	0	0	0	0	0		0	0	0	0	8	0	0	0
>miR777	AT1G30060	10545890	10545071	819		1	1	1	1	1	1	1	1	1	1	1	1	1	1	1	1	1		0	0	0	0	0	0	0	0	0	0	0	0	0	0	0	0	0		0	0	0	0	0	0	0	0
>miR778	AT2G22740	9674061	9669718	4343		1	1	3	3	1	1	1	1	1	2	1	1	1	4	1	1	1		0	0	3	3	0	0	0	0	0	2	0	0	0	4	0	0	0		0	0	0	0	0	0	0	0
>miR778	AT2G35160	14829903	14833241	3338		9	5	20	2	1	2	5	1	1	12	4	1	1	31	1	1	1		9	5	20	2	0	2	5	0	0	12	4	0	0	31	0	0	0		0	0	0	0	0	0	0	0
>miR779	AT5G53890	21894087	21897687	3600		13	4	2	12	3	1	1	3	1	19	1	4	1	1	1	12	1		13	4	2	12	3	0	0	3	0	19	0	4	0	0	1	12	0		0	0	0	0	0	0	0	0
>miR781	AT5G23480	7918338	7919281	943		1	1	1	1	1	1	1	1	1	1	1	1	1	1	1	1	1		0	0	0	0	0	0	0	0	0	0	0	0	0	0	0	0	0		0	0	0	0	0	0	0	0
>miR822	AT2G13900	5840126	5842291	2165		1	1	1	1	1	1	1	1	1	1	1	1	1	1	1	1	1		0	0	0	0	0	0	0	0	0	0	0	0	0	0	0	0	0		0	0	0	0	0	0	0	0
>miR822	AT5G02330	489240	487270	1970		1	1	1	1	1	1	1	1	1	1	1	1	1	1	1	1	1		0	0	0	0	0	0	0	0	0	0	0	0	0	0	0	0	0		0	0	0	0	0	0	0	0
>miR822	AT2G02620	717255	719375	2120		1	1	1	7	1	1	1	1	1	1	1	1	1	1	1	1	1		0	0	0	7	0	0	0	0	0	0	0	0	0	0	0	0	0		0	0	0	0	0	0	0	0
>miR822	AT5G02350	497264	495309	1955		1	1	1	1	1	1	1	1	1	1	1	1	1	1	1	1	1		0	0	0	0	0	0	0	0	0	0	0	0	0	0	0	0	0		0	0	0	0	0	0	0	0
>miR825	AT5G44970	18173064	18174567	1503		1	1	1	1	1	1	1	1	1	1	1	1	1	1	1	1	1		0	0	0	0	0	0	0	0	0	0	0	0	0	0	0	0	0		0	0	0	0	0	0	0	0
>miR826	AT4G03060	1354023	1351687	2336		1	1	2	1	1	1	1	1	2	1	27	67	1	44	1	1	1		0	0	2	0	0	0	0	0	2	0	27	67	0	44	0	0	0		0	0	0	0	0	0	0	0
>miR827	AT1G63010	23356311	23351382	4929		81	121	33	90	32	9	35	42	22	45	5	16	40	28	6	28	20		81	121	33	90	32	9	35	42	22	45	5	16	40	28	6	28	20		0	0	0	4	0	0	0	7
>miR828	AT3G60980	22577720	22576284	1436		18	34	1	9	8	5	1	1	1	1	1	1	1	1	1	1	1		18	34	0	9	8	5	0	0	0	0	0	0	0	0	0	0	0		0	0	7	0	0	0	0	0
>miR828	AT5G52600	21361194	21360328	866		1	5	1	1	4	18	8	5	10	1	4	1	1	1	4	2	1		0	5	0	0	4	18	8	5	10	0	4	0	1	0	4	2	0		0	0	0	0	0	0	0	0
>miR829.1	AT5G18560	6165993	6164589	1404		88	1	1	3	1	1	1	1	1	2	1	1	1	1	1	38	1		88	0	0	3	0	0	0	0	0	2	0	0	0	0	0	38	0		0	0	0	0	0	0	0	0
>miR831	AT3G12190	3886190	3886999	809		1	1	1	1	1	1	1	1	1	1	1	1	1	1	1	1	1		0	0	0	0	0	0	0	0	0	0	0	0	0	0	0	0	0		0	0	0	0	0	0	0	0
>miR832 (5')	AT2G46960	19301329	19299118	2211		1	1	1	1	192	1	1	1	1	1	1	1	1	1	1	1	384		0	0	0	0	192	0	0	0	0	0	0	0	0	0	0	0	384		0	0	0	0	0	0	0	0
>miR832(3')	AT4G30840	15019741	15017621	2120		1	1	1	1	1	1	1	1	1	1	1	1	1	1	1	1	1		0	0	0	0	0	0	0	0	0	0	0	0	0	0	0	0	0		0	0	0	0	0	0	0	0
>miR834	AT3G03870	995224	997417	2193		1	1	1	1	1	1	1	1	2	1	1	1	1	12	1	1	6		0	0	0	0	0	0	0	0	2	1	0	0	0	12	0	0	6		0	0	0	0	0	0	0	0
>miR834	AT3G10010	3088200	3081819	6381		33	80	21	4	17	14	5	9	4	1	13	1	1	6	1	20	9		33	80	21	4	17	14	5	9	4	0	13	0	0	6	0	20	9		0	0	2	0	0	4	0	0
>miR834	AT3G48050	17750397	17744518	5879		1	8	5	1	7	5	1	1	12	1	1	6	1	6	1	1	1		0	8	5	0	7	5	0	0	12	0	0	6	0	6	0	0	0		0	0	0	0	0	4	0	0
>miR834	AT4G00930	396558	400417	3859		5	1	5	1	1	6	17	4	4	7	1	1	1	16	1	19	1		5	0	5	0	0	6	17	4	4	7	0	0	0	16	0	19	0		0	0	0	0	0	0	0	0
>miR834	AT5G05840	1760667	1757099	3568		1	7	1	3	4	1	3	1	1	3	27	20	1	1	1	1	1		0	7	0	3	4	1	3	0	0	3	27	20	0	0	0	0	0		0	0	0	0	0	0	0	0
>miR834	AT5G24510	8369869	8369298	571		2	1	1	1	5	5	1	11	4	13	1	1	1	1	5	1	1		2	0	0	0	5	5	0	11	4	13	0	0	0	0	5	0	0		0	0	0	0	0	0	0	0
>miR835(3')	AT4G19600	10672775	10676745	3970		86	63	28	122	39	17	26	11	18	32	10	1	1	14	2	49	20		86	63	28	122	39	17	26	11	18	32	10	0	0	14	2	49	20		0	0	0	0	0	0	0	0
>miR835(3')	AT5G46170	18734180	18732192	1988		1	1	1	1	1	1	1	11	1	5	1	1	1	1	1	1	1		0	0	0	0	0	0	0	11	0	5	0	0	0	0	0	0	0		0	0	0	1	0	0	4	0
>miR835(5')	AT1G49560	18346222	18348031	1809		26	38	19	48	82	9	16	20	7	11	2	16	3	2	3	28	51		26	38	19	48	82	9	16	20	7	11	2	16	3	2	3	28	51		0	0	0	0	3	0	0	0
>miR835(5')	AT1G80340	30207092	30205585	1507		1	1	1	11	1	1	1	1	1	1	1	1	1	1	1	14	1		0	0	0	11	0	0	0	0	0	0	0	0	0	0	0	14	0		0	0	0	0	0	0	0	0
>miR835(5')	AT2G32120	13660998	13658587	2411		30	2	3	10	3	4	9	3	1	37	3	1	3	2	1	65	15		30	2	3	10	3	4	9	3	0	37	3	0	3	2	0	65	15		0	0	0	0	0	0	0	0
>miR835(5')	AT3G48910	18146073	18147324	1251		1	1	1	1	1	1	1	1	1	1	1	1	1	4	1	1	1		0	0	0	0	0	0	0	0	0	0	0	0	0	4	0	0	0		0	0	0	0	0	0	0	0
>miR837(5')	AT1G01160	72339	74096	1757		1	1	1	1	1	3	3	1	1	1	1	1	1	6	1	33	1		0	0	0	0	0	3	3	0	0	0	0	0	0	6	0	33	0		1	0	1	0	0	5	14	8
>miR837(5')	AT1G16800	5755256	5745516	9740		1	1	1	8	1	1	1	2	5	1	1	1	1	27	1	9	3		0	0	0	8	1	0	0	2	5	0	0	0	0	27	0	9	3		0	0	0	0	0	0	0	0
>miR837(5')	AT1G23020	8153346	8150075	3271		4	5	19	19	3	1	1	1	8	4	14	2	3	61	63	1	1		4	5	19	19	3	0	0	0	8	4	14	2	3	61	63	0	0		12	0	2	0	0	0	0	0
>miR837(5')	AT1G52500	19563652	19566782	3130		4	1	1	1	2	35	23	31	12	27	5	26	17	3	1	89	1		4	0	1	0	2	35	23	31	12	27	5	26	17	3	0	89	0		4	2	13	0	21	3	7	3
>miR837(5')	AT1G52590	19593942	19592678	1264		21	4	80	11	18	7	13	54	1	17	3	20	72	57	8	4	65		21	4	80	11	18	7	13	54	0	17	3	20	72	57	8	4	65		0	0	0	1	0	0	0	1
>miR837(5')	AT1G68845	25886097	25886581	484		1	1	1	1	1	1	1	1	1	1	1	1	1	1	1	1	1		0	0	0	0	0	0	0	0	0	0	0	0	0	0	0	0	0		0	0	0	0	0	0	0	0
>miR837(5')	AT4G00850	357551	359194	1643		3	5	2	3	2	13	19	4	9	2	3	2	6	1	60	32	3		3	5	2	3	2	13	19	4	9	2	3	2	6	1	60	32	3		0	0	0	0	0	0	0	0
>miR837(5')	AT5G18590	6182737	6178356	4381		7	12	5	1	1	45	63	80	47	12	48	41	1	40	27	12	68		7	12	5	0	1	45	63	80	47	12	48	41	0	40	27	12	68		0	0	0	0	0	1	0	6
>miR838	AT1G12850	4381610	4379705	1905		70	69	47	103	80	49	108	43	111	79	31	74	49	120	47	185	145		70	69	47	103	80	49	108	43	111	79	31	74	49	120	47	185	145		0	0	0	6	1	2	3	0
>miR838	AT1G72360	27245474	27246489	1015		5	1	1	3	1	1	3	1	1	73	4	2	1	2	11	1	3		5	0	0	3	0	0	3	0	0	73	4	2	0	2	11	0	3		0	0	3	5	0	0	0	0
>miR838	AT2G45720	18840438	18843448	3010		2	2	6	4	5	6	1	7	14	10	26	26	1	1	1	1	1		2	2	6	4	5	6	0	7	14	10	26	26	0	0	0	0	0		0	0	0	0	0	0	0	1
>miR838	AT3G12380	3941907	3938169	3738		29	10	5	14	15	17	11	7	7	21	20	1	1	6	1	20	5		29	10	5	14	15	17	11	7	7	21	20	0	1	6	0	20	5		0	0	0	0	0	0	0	0
>miR838	AT5G21930	7243041	7249173	6132		74	49	168	5	125	53	64	22	48	1	2	22	21	91	28	1	27		74	49	168	5	125	53	64	22	48	0	2	22	21	91	28	0	27		0	0	0	0	0	0	0	0
>miR838	AT5G46030	18687344	18688600	1256		104	38	69	27	56	244	163	79	178	179	88	92	40	167	42	176	168		104	38	69	27	56	244	163	79	178	179	88	92	40	167	42	176	168		0	0	0	0	0	0	0	0
>miR840	AT2G02740	769343	771247	1904		4	2	5	1	3	38	16	6	1	12	13	3	5	9	13	28	1		4	2	5	0	3	38	16	6	1	12	13	3	5	9	13	28	0		0	0	0	0	0	0	0	0
>miR841	AT1G70470	26563786	26563022	764		1	1	1	1	1	1	1	1	1	1	1	1	1	1	1	1	1		0	0	0	0	0	0	0	0	0	0	0	0	0	0	0	0	0		0	0	0	0	0	0	0	0
>miR841	AT2G38810	16228006	16226363	1643		1	1	1	1	1	1	1	1	1	1	1	1	1	1	1	1	1		0	0	0	0	0	0	0	0	0	0	0	0	0	0	0	0	0		0	0	0	0	0	0	0	0
>miR841	AT4G13570	7884512	7885660	1148		1	1	1	1	1	1	1	1	1	1	1	1	1	1	1	1	1		0	0	0	0	0	0	0	0	0	0	0	0	0	0	0	0	0		0	0	0	0	0	0	0	0
>miR842	AT1G52100	19389202	19386791	2411		1	1	20	1	1	1	1	1	1	1	1	1	1	2	557	1	1		0	0	20	0	0	0	0	0	0	0	0	0	0	2	557	0	0		0	0	0	0	0	0	0	0
>miR842	AT5G28520	10493114	10494856	1742		1	1	1	1	1	1	1	1	1	1	1	1	1	1	1	1	1		0	0	0	0	0	0	0	0	0	0	0	0	0	0	0	0	0		0	0	0	0	0	0	0	0
>miR842	AT1G52070	19370593	19368557	2036		1	1	1	1	1	1	1	1	1	176	1	1	1	1	169	3	1		0	0	0	0	0	0	0	0	0	176	0	0	0	0	169	3	0		0	0	0	0	0	0	0	0
>miR842	AT1G52120	19401904	19399750	2154		100	1	2	10	1	1	1	1	1	3	1	1	1	1	1	107	1		100	0	2	10	0	0	0	0	0	3	1	0	0	0	0	107	0		0	0	0	0	0	0	0	0
>miR842	AT1G57570	21324603	21328302	3699		1	1	1	1	1	1	1	1	1	1	1	1	1	1	1	1	1		0	0	0	0	0	0	0	0	0	0	0	0	0	0	0	0	0		0	0	0	0	0	0	0	0
>miR842	AT1G60130	22177844	22179986	2142		1	1	1	1	1	1	1	1	1	1	1	1	1	1	1	1	1		0	0	0	0	0	0	0	0	0	0	0	0	0	0	0	0	0		0	0	0	0	0	0	0	0
>miR842	AT2G37340	15679779	15677226	2553		326	73	74	276	48	172	139	239	80	406	118	3	35	130	46	299	29		326	73	74	276	48	172	139	239	80	406	118	3	35	130	46	299	29		0	0	0	1	0	4	4	0
>miR842	AT3G43610	15534915	15528760	6155		27	87	30	25	37	4	12	11	11	1	31	1	1	2	1	7	1		27	87	30	25	37	4	12	11	11	0	31	0	0	2	0	7	0		0	0	0	0	0	4	0	0
>miR843	AT1G11810	3989816	3991065	1249		1	1	1	1	1	1	1	1	1	1	1	1	1	1	1	1	1		0	0	0	0	0	0	0	0	0	0	0	0	0	0	0	0	0		0	0	0	0	0	0	0	0
>miR843	AT2G22810	9726552	9724871	1681		28	1	1	1	1	1	1	1	1	1	1	1	1	1	1	1	1		28	0	0	0	0	0	0	0	0	0	0	0	0	0	0	0	0		0	0	0	0	0	0	0	0
>miR843	AT3G13830	4553950	4555083	1133		1	1	1	1	1	1	1	1	1	1	1	1	1	1	1	1	1		0	0	0	0	0	0	0	0	0	0	0	0	0	0	0	0	0		0	0	0	0	0	0	0	0
>miR844(3')	AT3G46540	17146572	17145076	1496		37	26	48	12	55	19	60	41	37	5	45	21	21	78	32	12	91		37	26	48	12	55	19	60	41	37	5	45	21	21	78	32	12	91		0	0	0	0	0	0	0	0
>miR846	AT1G52050	19360433	19358588	1845		1	1	1	32	1	1	1	1	1	9	1	1	1	1	4	1	1		0	0	0	32	0	0	0	0	0	9	0	0	0	0	4	0	0		0	0	0	0	0	0	0	0
>miR846	AT1G52060	19364344	19362708	1636		1	1	3	14	1	1	1	1	1	69	1	1	1	1	15	1	1		0	0	3	14	0	0	0	0	0	69	0	0	0	0	15	0	0		0	0	0	0	0	0	0	0
>miR846	AT1G52070	19370593	19368557	2036		1	1	1	1	1	1	1	1	1	176	1	1	1	1	169	3	1		0	0	0	0	0	0	0	0	0	176	0	0	0	0	169	3	0		0	0	0	0	0	0	0	0
>miR846	AT1G52130	19406032	19404288	1744		1	1	1	1	1	1	1	1	1	1	1	1	1	1	1	1	1		0	0	0	0	0	0	0	0	0	0	0	0	0	0	0	0	0		0	0	0	0	0	0	0	0
>miR846	AT1G57570	21324603	21328302	3699		1	1	1	1	1	1	1	1	1	1	1	1	1	1	1	1	1		0	0	0	0	0	0	0	0	0	0	0	0	0	0	0	0	0		0	0	0	0	0	0	0	0
>miR846	AT1G60110	22172167	22174314	2147		1	1	1	1	1	1	1	1	1	1	1	1	1	1	1	1	1		0	0	0	0	0	0	0	0	0	0	0	0	0	0	0	0	0		0	0	0	0	0	0	0	0
>miR846	AT2G25980	11086996	11084566	2430		7	1	1	382	1	1	1	1	1	8	2	1	1	1	1	1	1		7	0	0	382	0	0	0	0	0	8	2	0	0	0	0	0	0		0	0	0	8	0	0	0	0
>miR846	AT5G28520	10493114	10494856	1742		1	1	1	1	1	1	1	1	1	1	1	1	1	1	1	1	1		0	0	0	0	0	0	0	0	0	0	0	0	0	0	0	0	0		0	0	0	0	0	0	0	0
>miR846	AT5G49870	20289774	20287418	2356		1	1	1	1	1	1	1	1	1	1	1	1	1	1	1	1	1		0	0	0	0	0	0	0	0	0	0	0	0	0	0	0	0	0		0	0	0	0	0	0	0	0
>miR846	AT1G33790	12256644	12260555	3911		129	1	14	13	1	6	10	1	6	30	1	1	1	12	4	233	1		129	0	14	13	0	6	10	0	6	30	0	0	0	12	4	233	0		8	0	0	0	0	0	0	0
>miR847	AT1G49120	18177095	18178084	989		1	1	1	1	1	1	1	1	1	1	1	1	1	1	1	1	1		0	0	0	0	0	0	0	0	0	0	0	0	0	0	0	0	0		0	0	0	0	0	0	0	0
>miR847	AT1G53340	19904599	19902596	2003		1	1	1	1	1	1	1	1	1	1	1	1	1	1	1	1	1		0	0	0	0	0	0	0	0	0	0	0	0	0	0	0	0	0		0	0	0	0	0	0	0	0
>miR847	AT1G53720	20060201	20063306	3105		34	16	35	43	21	11	27	24	52	51	13	3	12	6	1	35	25		34	16	35	43	21	11	27	24	52	51	13	3	12	6	1	35	25		0	0	0	0	0	0	0	0
>miR847	AT1G74620	28031913	28032662	749		1	1	1	1	1	1	1	1	1	1	1	1	1	1	1	1	1		0	0	0	0	0	0	0	0	0	0	0	0	0	0	0	0	0		0	0	0	0	0	0	0	0
>miR847	AT2G19740	8520595	8521601	1006		276	154	154	417	174	50	116	58	90	183	234	52	101	69	42	117	199		276	154	154	417	174	50	116	58	90	183	234	52	101	69	42	117	199		1	0	0	1	23	0	4	2
>miR847	AT5G51330	20878937	20875932	3005		1	1	1	11	1	1	1	1	1	1	1	1	1	1	1	1	1		0	0	0	11	0	0	0	0	0	0	0	0	0	0	0	0	0		0	0	0	0	0	0	0	0
>miR856	AT1G11200	3753365	3755639	2274		46	70	39	83	69	3	5	3	5	1	1	3	1	23	1	1	1		46	70	39	83	69	3	5	3	5	0	0	3	0	23	0	0	0		0	0	0	0	0	0	0	0
>miR856	AT1G48040	17725510	17723409	2101		23	22	15	15	26	1	3	1	4	5	4	1	2	1	1	28	50		23	22	15	15	26	1	3	0	4	5	4	0	2	0	0	28	50		0	0	0	0	0	0	0	0
>miR856	AT2G46800	19244503	19246474	1971		164	151	130	240	214	87	86	129	141	174	48	6	1	22	52	87	95		164	151	130	240	214	87	86	129	141	174	48	6	0	22	52	87	95		0	0	0	6	0	2	0	3
>miR858	AT1G06180	1889407	1891157	1750		9	1	6	9	5	3	12	1	2	56	13	1	6	3	1	21	1		9	0	6	9	5	3	12	1	2	56	13	0	6	3	0	21	0		0	0	0	0	0	0	0	0
>miR858	AT5G49330	20018604	20016178	2426		1	2	1	1	3	4	2	44	45	1	30	1	1	1	1	1	11		0	2	0	0	3	4	2	44	45	0	30	0	0	0	0	0	11		0	0	0	0	0	0	0	0
>miR858	AT1G66230	24680817	24682078	1261		1	1	4	1	7	1	6	1	1	1	1	1	1	1	1	1	1		0	0	4	0	7	0	6	0	0	0	0	0	0	0	0	0	0		0	0	0	0	0	0	0	0
>miR858	AT4G12350	7324910	7326633	1723		1	1	1	1	1	1	1	1	1	1	1	1	1	1	1	1	1		0	0	0	0	0	0	0	0	0	0	0	0	0	0	0	0	0		0	0	0	0	0	0	0	0
>miR858	AT3G62610	23165734	23167561	1827		1	1	1	1	7	1	1	2	1	1	1	1	1	1	11	1	1		0	0	0	0	7	0	0	2	0	0	0	0	0	0	11	0	0		0	0	0	0	0	0	0	0
>miR858	AT3G24310	8812369	8811138	1231		1	1	1	1	1	1	1	1	1	5	1	1	1	1	1	1	1		0	0	0	0	0	0	0	0	0	5	0	0	0	0	0	0	0		0	0	0	0	0	0	0	0
>miR858	AT2G26950	11509154	11507907	1247		1	1	1	1	1	1	1	1	1	1	1	1	1	1	1	1	1		0	0	0	0	0	0	0	0	0	0	0	0	0	0	0	0	0		0	0	0	0	0	0	0	0
>miR858	AT2G47460	19483407	19486548	3141		1	29	1	8	2	4	11	4	2	1	8	1	1	1	1	13	1		0	29	0	8	2	4	11	4	2	0	8	0	0	0	1	13	0		0	0	0	0	0	0	0	0
>miR858	AT3G27170	10025254	10028435	3181		1	1	8	41	1	6	1	1	1	20	1	1	1	19	8	1	1		0	0	8	41	0	6	0	0	0	20	0	0	0	19	8	0	0		0	0	0	0	0	0	0	0
>miR858	AT3G49690	18438720	18440186	1466		1	1	1	1	1	1	1	1	1	1	1	1	1	1	1	1	1		0	0	0	0	0	0	0	0	0	0	0	0	0	0	0	0	0		0	0	0	0	0	0	0	0
>miR858	AT5G23000	7696138	7697930	1792		1	1	1	1	1	1	1	1	1	1	1	1	1	1	1	1	1		0	0	0	0	0	0	0	0	0	0	0	0	0	0	0	0	0		0	0	0	0	0	0	0	0
>miR858	AT5G56110	22736417	22737890	1473		1	1	1	1	1	1	1	1	1	1	1	1	1	1	1	1	1		0	0	0	0	0	0	0	0	0	0	0	0	0	0	0	0	0		0	0	0	0	0	0	0	0
>miR859	AT1G11810	3989816	3991065	1249		1	1	1	1	1	1	1	1	1	1	1	1	1	1	1	1	1		0	0	0	0	0	0	0	0	0	0	0	0	0	0	0	0	0		0	0	0	0	0	0	0	0
>miR859	AT1G24793	8766379	8771029	4650		1	1	1	1	1	1	1	1	1	1	1	1	1	1	1	1	1		0	0	0	0	0	0	0	0	0	0	0	0	0	0	0	0	0		0	0	0	0	0	0	0	0
>miR859	AT1G24880	8780759	8785408	4649		1	1	1	1	1	1	1	1	1	1	1	1	1	1	1	1	1		0	0	0	0	0	0	0	0	0	0	0	0	0	0	0	0	0		0	0	0	0	0	0	0	0
>miR859	AT1G25054	8803287	8808081	4794		1	1	1	1	1	1	1	1	1	1	1	1	1	1	1	1	1		0	0	0	0	0	0	0	0	0	0	0	0	0	0	0	0	0		0	0	0	0	0	0	0	0
>miR859	AT1G25141	8817665	8822520	4855		1	1	1	1	1	1	1	1	1	1	1	1	1	1	1	1	1		0	0	0	0	0	0	0	0	0	0	0	0	0	0	0	0	0		0	0	0	0	0	0	0	0
>miR859	AT1G25210	8832043	8836784	4741		1	1	1	1	1	1	1	1	1	1	1	1	1	1	1	1	1		0	0	0	0	0	0	0	0	0	0	0	0	0	0	0	0	0		0	0	0	0	0	0	0	0
>miR859	AT1G32140	11564813	11562722	2091		1	1	1	1	1	1	1	1	1	1	6	1	1	1	1	1	1		0	0	0	0	0	0	0	0	0	0	6	0	0	0	0	0	0		0	0	0	0	0	0	0	0
>miR859	AT1G67450	25269826	25271022	1196		1	1	1	1	1	1	1	1	1	1	1	1	1	1	1	1	1		0	0	0	0	0	0	0	0	0	0	0	0	0	0	0	0	0		0	0	0	0	0	0	0	0
>miR859	AT2G04920	1726135	1727265	1130		1	1	1	1	1	1	1	1	1	1	1	1	1	1	1	1	1		0	0	0	0	0	0	0	0	0	0	0	0	0	0	0	0	0		0	0	0	0	0	0	0	0
>miR859	AT2G18780	8145200	8143840	1360		1	1	1	1	1	1	1	1	1	1	1	1	1	1	1	1	1		0	0	0	0	0	0	0	0	0	0	0	0	0	0	0	0	0		0	0	0	4	0	0	0	0
>miR859	AT2G24510	10411453	10412537	1084		1	1	1	1	1	1	1	1	1	1	1	1	1	1	1	1	1		0	0	0	0	0	0	0	0	0	0	0	0	0	0	0	0	0		0	0	0	0	0	0	0	0
>miR859	AT2G27520	11769139	11770182	1043		1	4	3	1	1	1	1	1	1	2	1	1	1	1	1	1	5		0	4	3	0	0	0	0	0	0	2	0	0	0	0	0	0	5		0	0	0	0	0	0	0	0
>miR859	AT3G13820	4549623	4550870	1247		1	1	1	1	1	1	1	1	1	1	1	1	1	1	1	1	1		0	0	0	0	0	0	0	0	0	0	0	0	0	0	0	0	0		0	0	0	0	0	0	0	0
>miR859	AT3G13830	4553950	4555083	1133		1	1	1	1	1	1	1	1	1	1	1	1	1	1	1	1	1		0	0	0	0	0	0	0	0	0	0	0	0	0	0	0	0	0		0	0	0	0	0	0	0	0
>miR859	AT3G16820	5729180	5728022	1158		1	1	1	1	1	1	1	1	1	1	1	1	1	1	1	1	1		0	0	0	0	0	0	0	0	0	0	0	0	0	0	0	0	0		0	0	0	0	0	0	0	0
>miR859	AT3G16880	5766739	5767836	1097		1	1	1	1	1	1	1	1	1	1	1	1	1	1	1	1	1		0	0	0	0	0	0	0	0	0	0	0	0	0	0	0	0	0		0	0	0	0	0	0	0	0
>miR859	AT3G17265	5900643	5899521	1122		1	1	1	1	1	1	1	1	1	1	1	1	1	1	1	1	1		0	0	0	0	0	0	0	0	0	0	0	0	0	0	0	0	0		0	0	0	0	0	0	0	0
>miR859	AT3G17280	5904619	5903459	1160		1	1	1	1	1	1	1	1	1	1	1	1	1	1	1	1	1		0	0	0	0	0	0	0	0	0	0	0	0	0	0	0	0	0		0	0	0	0	0	0	0	0
>miR859	AT3G17540	6002789	6003979	1190		1	1	1	1	1	1	1	1	1	1	1	1	1	1	1	1	1		0	0	0	0	0	0	0	0	0	0	0	0	0	0	0	0	0		0	0	0	0	0	0	0	0
>miR859	AT3G17570	6009413	6010568	1155		1	1	1	1	1	1	1	1	1	1	1	1	1	1	1	1	1		0	0	0	0	0	0	0	0	0	0	0	0	0	0	0	0	0		0	0	0	0	0	0	0	0
>miR859	AT3G19880	6912610	6911441	1169		1	1	1	1	1	1	1	1	1	1	1	1	1	1	1	1	1		0	0	0	0	0	0	0	0	0	0	0	0	0	0	0	0	0		0	0	0	0	0	0	0	0
>miR859	AT3G20710	7239005	7237917	1088		1	1	1	1	1	1	1	1	1	1	1	1	1	1	1	1	1		0	0	0	0	0	0	0	0	0	0	0	0	0	0	0	0	0		0	0	0	0	0	0	0	0
>miR859	AT3G21170	7419982	7421166	1184		1	1	1	1	1	1	1	1	1	1	1	1	1	1	1	1	1		0	0	0	0	0	0	0	0	0	0	0	0	0	0	0	0	0		0	0	0	0	0	0	0	0
>miR859	AT3G22350	7901912	7903048	1136		1	1	1	1	1	1	1	1	1	1	1	1	1	1	1	1	1		0	0	0	0	0	0	0	0	0	0	0	0	0	0	0	0	0		0	0	0	0	0	0	0	0
>miR859	AT3G22700	8025821	8024805	1016		1	1	7	1	1	1	1	1	1	1	1	1	1	1	1	3	1		0	0	7	0	0	0	0	0	0	0	0	0	0	0	0	3	0		0	0	0	0	0	0	0	0
>miR859	AT3G22710	8027281	8026209	1072		1	1	1	1	1	1	1	1	1	1	1	1	1	1	1	1	1		0	0	0	0	0	0	0	0	0	0	0	0	0	0	0	0	0		0	0	0	0	0	0	0	0
>miR859	AT3G22720	8030104	8028968	1136		1	1	1	1	1	1	1	1	1	1	1	1	1	1	1	1	1		0	0	0	0	0	0	0	0	0	0	0	0	0	0	0	0	0		0	0	0	0	0	0	0	0
>miR859	AT3G24580	8969169	8970305	1136		1	1	1	1	1	1	1	1	1	1	1	1	1	1	1	1	1		0	0	0	0	0	0	0	0	0	0	0	0	0	0	0	0	0		0	0	0	0	0	0	0	0
>miR859	AT3G49520	18370569	18371735	1166		1	1	1	1	1	1	1	1	1	1	1	1	1	1	1	1	1		0	0	0	0	0	0	0	0	0	0	0	0	0	0	0	0	0		0	0	0	0	0	0	0	0
>miR859	AT4G33290	16049577	16050869	1292		1	1	1	1	1	1	1	1	1	1	1	1	1	1	1	1	1		0	0	0	0	0	0	0	0	0	0	0	0	0	0	0	0	0		0	0	0	0	0	0	0	0
>miR859	AT5G36200	14263526	14261336	2190		1	1	1	1	1	1	1	1	1	1	1	1	1	1	1	1	1		0	0	0	0	0	0	0	0	0	0	0	0	0	0	0	0	0		0	0	0	0	0	0	0	0
>miR859	AT5G36730	14453547	14454779	1232		1	1	1	1	1	1	1	1	1	1	1	1	1	1	1	1	1		0	0	0	0	0	0	0	0	0	0	0	0	0	0	0	0	0		0	0	0	0	0	0	0	0
>miR859	AT5G36820	14512847	14514079	1232		1	1	1	1	1	1	1	1	1	1	1	1	1	1	1	1	1		0	0	0	0	0	0	0	0	0	0	0	0	0	0	0	0	0		0	0	0	0	0	0	0	0
>miR859	AT5G42460	16997013	16998343	1330		1	1	1	1	1	1	1	1	1	1	1	1	1	1	1	1	1		0	0	0	0	0	0	0	0	0	0	0	0	0	0	0	0	0		0	0	0	0	0	0	0	0
>miR865-3p	AT3G02340	477010	478449	1439		38	24	25	35	17	1	15	25	5	21	9	1	19	25	1	23	3		38	24	25	35	17	1	15	25	5	21	9	0	19	25	0	23	3		0	0	0	0	0	0	0	0
>miR865-3p	AT3G10160	3144528	3139388	5140		2	41	30	25	34	10	27	21	30	1	1	3	1	19	8	5	77		2	41	30	25	34	10	27	21	30	1	0	3	0	19	8	5	77		5	0	0	0	0	6	9	8
>miR865-3p	AT1G05680	1704688	1703091	1597		9	7	2	1	25	25	12	20	26	3	35	1	361	48	1	15	11		9	7	2	0	25	25	12	20	26	3	35	0	361	48	1	15	11		0	0	0	0	0	0	0	5
>miR865-3p	AT1G31290	11188274	11192298	4024		163	1	6	27	12	1	1	1	1	1	2	1	1	1	1	2	1		163	0	6	27	12	0	0	0	0	0	2	0	0	0	0	2	0		0	0	0	0	0	0	0	0
>miR865-3p	AT1G64880	24109305	24112809	3504		107	114	29	99	33	54	51	52	51	82	32	17	10	24	9	110	132		107	114	29	99	33	54	51	52	51	82	32	17	10	24	9	110	132		0	0	0	3	0	2	0	0
>miR865-3p	AT5G67450	26937175	26936019	1156		1	1	2	27	1	1	1	1	1	28	1	1	9	1	1	1	1		0	0	2	27	0	0	0	0	0	28	0	0	9	0	0	0	0		0	0	0	0	0	0	0	0
>miR866-3p	AT1G09680	3135932	3134109	1823		5	1	2	11	1	4	1	1	1	1	17	1	1	1	1	15	1		5	0	2	11	0	4	0	1	0	0	17	0	0	0	0	15	0		0	0	0	0	0	0	0	0
>miR866-3p	AT2G22070	9390682	9393144	2462		1	1	1	1	1	1	15	2	8	1	1	1	1	1	1	1	1		0	0	0	0	0	1	15	2	8	0	0	0	0	0	0	0	0		0	0	0	0	0	0	0	0
>miR866-3p	AT3G05380	1539649	1546402	6753		59	26	2	14	27	31	29	18	11	13	16	1	1	3	1	34	1		59	26	2	14	27	31	29	18	11	13	16	0	0	3	0	34	0		0	0	0	0	0	0	0	0
>miR866-3p	AT5G18370	6088928	6085038	3890		1	1	1	1	1	1	1	1	1	1	1	1	1	1	1	1	1		0	0	0	0	0	0	0	0	0	0	0	0	0	0	0	0	0		0	0	0	0	0	0	0	0
>CandidateB	AT1G07640	2356224	2354351	1873		18	58	96	64	92	13	19	46	17	90	56	1	25	55	13	12	136		18	58	96	64	92	13	19	46	17	90	56	0	25	55	13	12	136		0	0	0	4	0	0	0	0
>CandidateB	AT1G21340	7476075	7476857	782		1	1	1	1	1	1	1	1	1	1	1	1	1	1	1	10	1		0	0	0	0	0	0	0	0	0	0	0	0	0	0	0	10	0		0	0	0	0	0	0	0	0
>CandidateB	AT1G26790	9275299	9273844	1455		1	1	1	1	1	1	1	1	1	1	1	1	1	1	1	1	1		0	0	0	0	0	0	0	0	0	0	0	0	0	0	0	0	0		0	0	0	0	0	0	0	0
>CandidateB	AT1G47655	17527805	17528746	941		1	1	6	8	4	4	1	1	1	1	15	1	1	2	1	1	1		0	0	6	8	4	4	0	0	0	0	15	0	0	2	0	0	0		0	0	0	0	0	0	0	0
>CandidateB	AT1G51700	19177738	19178857	1119		8	26	28	7	37	31	10	10	34	3	2	36	17	54	1	94	77		8	26	28	7	37	31	10	10	34	3	2	36	17	54	0	94	77		0	0	0	0	0	0	0	0
>CandidateB	AT1G64620	24010655	24012357	1702		8	21	7	28	4	1	11	5	7	10	17	1	1	8	1	5	9		8	21	7	28	4	0	11	5	7	10	17	0	0	8	0	5	9		14	2	0	15	0	0	0	0
>CandidateB	AT1G69570	26167159	26165191	1968		1	2	1	1	2	2	1	1	11	1	16	1	1	40	1	72	12		0	2	0	0	2	2	1	0	11	0	16	0	0	40	0	72	12		0	0	0	0	0	0	0	0
>CandidateB	AT2G28810	12370707	12372454	1747		18	125	39	73	25	10	12	34	13	64	8	10	1	8	1	15	1		18	125	39	73	25	10	12	34	13	64	8	10	0	8	0	15	0		0	0	0	0	0	0	0	0
>CandidateB	AT3G21270	7474685	7475763	1078		40	17	109	17	96	4	5	1	10	3	1	1	2	17	1	42	13		40	17	109	17	96	4	5	0	10	3	0	0	2	17	0	42	13		0	0	0	0	0	0	0	0
>CandidateB	AT3G50410	18720729	18721741	1012		32	8	3	8	12	4	9	1	7	9	1	1	1	8	1	15	10		32	8	3	8	12	4	9	0	7	9	0	0	0	8	0	15	10		0	0	0	0	0	0	0	0
>CandidateB	AT3G52440	19446425	19447168	743		4	2	1	1	1	1	1	1	1	1	1	1	1	1	1	1	1		4	2	0	0	0	0	0	0	0	0	0	0	0	0	0	0	0		0	0	0	0	0	0	0	0
>CandidateB	AT3G55370	20538042	20540268	2226		9	44	47	51	1	1	8	4	7	9	33	7	1	2	3	1	1		9	44	47	51	0	0	8	4	7	9	33	7	0	2	3	0	0		0	0	0	0	0	0	0	0
>CandidateB	AT4G00940	404810	403320	1490		77	1	1	5	3	7	3	1	1	8	3	1	1	3	1	56	1		77	0	0	5	3	7	3	0	0	8	3	1	0	3	0	56	0		11	0	0	5	0	0	0	0
>CandidateB	AT4G38000	17858354	17859319	965		1	8	1	1	1	7	22	1	10	1	1	1	1	1	1	1	1		0	8	0	0	0	7	22	0	10	0	1	0	0	0	0	0	0		0	0	0	0	0	0	0	0
>CandidateB	AT5G02460	541110	539247	1863		17	1	4	5	2	1	1	1	1	1	1	1	1	1	1	1	1		17	0	4	5	2	0	0	0	0	0	0	0	0	0	0	0	0		0	0	0	0	0	0	0	0
>CandidateB	AT5G39660	15895927	15898272	2345		4	1	4	4	1	1	3	2	1	3	3	1	1	1	1	1	1		4	0	4	4	0	0	3	2	0	3	3	0	0	0	0	0	0		12	0	1	0	0	0	0	0
>CandidateB	AT5G60850	24497675	24499099	1424		13	71	49	44	95	2	9	19	26	29	64	34	1	36	1	7	60		13	71	49	44	95	2	9	19	26	29	64	34	0	36	0	7	60		0	0	0	0	2	0	0	0
>CandidateB	AT5G62430	25088160	25086319	1841		1	1	36	12	31	2	1	1	1	1	3	1	1	5	1	1	1		0	0	36	12	31	2	0	0	0	1	3	0	0	5	0	0	0		0	0	0	0	0	0	0	0
>CandidateB	AT5G62940	25275907	25274145	1762		19	2	3	1	2	9	14	5	11	15	1	1	1	5	1	12	1		19	2	3	1	2	9	14	5	11	15	0	0	0	5	0	12	1		0	0	0	0	0	0	0	0
>CandidateB	AT5G65590	26230362	26228972	1390		1	11	3	1	2	1	1	1	1	1	1	1	1	1	1	1	1		0	11	3	0	2	0	0	0	0	0	0	0	0	0	0	0	0		0	0	0	0	0	0	0	0
>CandidateB	AT5G66940	26745892	26745215	677		1	11	1	1	1	1	4	1	1	1	1	1	1	1	1	1	1		0	11	0	0	0	0	4	0	0	0	0	0	0	0	0	0	0		0	0	0	0	0	0	0	0
>CandidateC	AT2G30690	13083306	13085672	2366		1	1	1	1	1	1	1	1	1	1	1	1	1	1	1	1	1		0	0	0	0	0	0	0	0	0	0	0	0	0	0	0	0	0		0	0	0	0	0	0	0	0
>CandidateD	AT3G08500	2578252	2576800	1452		1	9	1	1	6	1	1	1	1	1	1	1	1	1	1	1	1		0	9	0	1	6	0	0	0	0	0	0	0	0	0	0	0	0		0	0	0	0	0	0	0	0
																								CAF	INF	LEF	ROF	SIF	AP1	AP3	AGM	INS	ROS	SAP	S04	S52	LES	GSE	CAS	SIS
																					predicted	sense		17.2297	18.5336	14.4841	20.6855	17.3004	8.63251	12.7597	11.689	11.7456	16.1201	10.477	4.21201	6.36042	10.0177	8.40989	18.0212	15.0495
																						antisense		0.0234441	0.00818759	0.0211835	0.0190164	0.0143963	0.0336621	0.0209742	0.021828	0.0296159	0.0248988	0.0336099	0.0213878	0.0191822	0.0253241	0.0593944	0.0177651	0.0145849
[truncated: 26 more columns]

## Sheet: Paralogs
						Normalized abundance for MPSS mRNA sense signatures (replace 0 by 1)																		Abundance for MPSS mRNA sense signatures-raw data																		Abundance for MPSS mRNA antisense signatures-raw data
miRNA	Target	5' End	3' End	Len (bp)		CAF	INF	LEF	ROF	SIF	AP1	AP3	AGM	INS	ROS	SAP	S04	S52	LES	GSE	CAS	SIS		CAF	INF	LEF	ROF	SIF	AP1	AP3	AGM	INS	ROS	SAP	S04	S52	LES	GSE	CAS	SIS		CAF	INF	LEF	ROF	SIF	AP1	AP3	AGM
>miR156	AT1G02065	365209	367340	2131		1	36	1	1	1	88	36	23	35	1	50	1	1	1	1	1	6		0	36	0	0	0	88	36	23	35	0	50	0	0	0	0	0	6		0	0	0	0	0	15	6	2
>miR156	AT3G60030	22180549	22176631	3918		38	115	37	20	25	5	29	24	37	16	17	3	32	31	3	96	9		38	115	37	20	25	5	29	24	37	16	17	3	32	31	3	96	9		0	10	0	0	0	8	0	6
>miR158	AT5G46100	18712961	18711543	1418		1	1	1	1	1	1	1	1	1	1	1	1	1	1	1	1	1		0	0	0	0	0	0	0	0	0	0	0	0	0	0	0	0	0		0	0	0	0	0	0	0	0
>miR158	AT4G21300	11336489	11339062	2573		4	2	1	1	1	1	1	1	1	1	1	1	1	1	17	1	1		4	2	0	1	0	0	0	0	0	0	0	0	0	0	17	0	0		0	0	0	0	6	0	6	0
>miR158	AT3G26540	9747881	9745779	2102		1	1	1	1	1	1	1	1	1	1	1	1	1	1	1	1	1		0	0	0	0	0	0	0	0	0	0	0	0	0	0	0	0	0		0	0	0	0	0	0	0	0
>miR158	AT1G08610	2735470	2733791	1679		10	8	9	10	1	67	21	53	18	49	11	14	1	2	10	11	2		10	8	9	10	0	67	21	53	18	49	11	14	1	2	10	11	2		0	0	0	0	0	0	0	0
>miR159	AT4G05100	2618452	2619885	1433		3	1	1	1	1	1	1	1	1	1	1	1	1	1	1	8	1		3	0	0	0	0	0	0	0	0	0	0	0	0	0	0	8	0		0	0	0	0	0	0	0	0
>miR159	AT4G21440	11419771	11418257	1514		1	19	1	1	1	1	1	1	1	1	1	1	1	29	1	1	1		0	19	0	0	0	0	0	0	0	0	0	0	0	29	0	0	0		0	0	0	0	0	0	0	0
>miR159	AT5G65230	26085516	26086878	1362		1	2	2	7	1	1	1	1	1	1	1	1	1	1	1	1	1		0	2	2	7	0	0	0	0	1	0	1	0	0	0	0	0	0		0	0	0	0	0	0	0	0
>miR159	AT3G02940	661880	664013	2133		1	1	1	1	1	1	1	1	1	1	1	1	1	1	1	1	1		0	0	0	0	0	0	0	0	0	0	0	0	0	0	0	0	0		0	0	0	0	0	0	0	0
>miR159	AT1G22640	8006184	8007417	1233		51	76	22	42	92	6	23	19	34	16	8	1	1	13	1	82	77		51	76	22	42	92	6	23	19	34	16	8	1	0	13	0	82	77		0	0	0	0	0	0	0	0
>miR160	AT5G62000	24927584	24932440	4856		348	680	307	337	202	169	168	342	310	97	141	71	137	288	29	162	144		348	680	307	337	202	169	168	342	310	97	141	71	137	288	29	162	144		8	0	4	0	3	32	36	22
>miR160	AT1G35240	12930501	12927435	3066		1	1	1	1	1	1	1	1	1	1	1	1	1	1	1	1	1		0	0	0	0	0	0	0	0	0	0	0	0	0	0	0	0	0		0	0	0	0	0	0	0	0
>miR160	AT1G34170	12446742	12443525	3217		1	1	1	1	1	1	1	1	1	1	1	1	1	1	1	1	1		0	0	0	0	0	0	0	0	0	0	0	0	0	0	0	0	0		0	0	0	0	0	0	0	0
>miR161	AT4G28010	13930365	13933276	2911		1	4	4	4	4	9	2	1	12	1	1	1	1	1	1	1	1		0	4	4	4	4	9	2	0	12	1	0	0	0	0	0	0	0		0	0	0	0	0	0	0	0
>miR161	AT2G19280	8369517	8373226	3709		1	1	1	1	1	4	9	1	1	1	1	1	1	1	1	1	8		1	0	0	0	0	4	9	0	0	0	0	0	0	0	0	0	8		0	0	0	4	0	0	0	0
>miR162	AT5G20320	6869268	6859220	10048		24	19	69	21	41	14	15	14	26	9	20	21	52	6	1	33	26		24	19	69	21	41	14	15	14	26	9	20	21	52	6	0	33	26		0	0	0	0	0	0	0	0
>miR163	AT5G37970	15141914	15140319	1595		1	1	1	1	1	1	1	1	1	1	1	1	1	1	1	1	1		0	0	0	0	0	0	0	0	0	0	0	0	0	0	0	0	0		0	0	0	0	0	0	0	0
>miR163	AT1G68040	25506539	25508895	2356		1	1	1	8	1	1	1	1	1	1	1	1	1	1	1	1	1		0	0	0	8	0	0	0	0	0	0	0	0	0	0	0	0	0		0	0	0	0	0	0	0	0
>miR163	AT5G66430	26544025	26542636	1389		1	1	1	1	1	1	1	1	1	1	1	1	1	1	1	1	1		0	0	0	0	0	0	0	0	0	0	0	0	0	0	0	0	0		0	0	0	0	0	0	0	0
>miR164	AT3G18400	6320599	6318751	1848		13	1	1	14	1	1	1	1	1	1	1	1	1	1	1	1	1		13	0	0	14	0	0	0	0	0	0	0	0	0	0	0	0	0		0	0	0	0	0	0	0	0
>miR164	AT3G29035	11034902	11036545	1643		5	1	23	38	1	1	1	1	1	38	1	1	11	4	6	1	1		5	0	23	38	0	0	0	0	0	38	0	0	11	4	6	0	0		0	0	0	0	0	0	0	0
>miR164	AT1G76420	28678828	28676923	1905		2	1	1	1	1	10	1	1	1	1	1	1	1	1	1	1	1		2	1	0	0	0	10	0	0	0	0	0	0	0	0	0	0	0		0	0	0	0	0	0	0	0
>miR164	AT4G28530	14094782	14090495	4287		3	23	2	9	39	1	1	11	1	1	23	1	1	1	1	1	1		3	23	2	9	39	0	0	11	1	0	23	0	0	0	0	0	0		0	0	0	0	0	0	0	0
>miR164	AT2G24430	10393705	10390597	3108		1	1	1	1	1	1	1	1	1	1	1	1	1	1	1	1	1		0	0	0	0	0	0	0	0	0	0	0	0	0	0	0	0	0		0	0	0	0	0	0	0	0
>miR164	AT1G71930	27079802	27081619	1817		1	1	1	1	1	1	1	1	2	1	2	1	1	1	1	1	13		0	0	0	0	0	0	0	0	2	0	2	0	0	0	0	0	13		0	0	0	0	0	0	0	0
>miR164	AT1G52800	19667712	19669030	1318		1	1	1	1	1	1	1	1	1	1	1	1	1	1	1	1	1		0	0	0	0	0	0	0	0	0	0	0	0	0	0	0	0	0		0	0	0	0	0	0	0	0
>miR164	AT1G33060	11978501	11975320	3181		4	1	4	2	1	12	6	2	24	30	24	1	1	22	1	26	1		4	0	4	2	0	12	6	2	24	30	24	0	0	22	0	26	0		0	0	0	0	0	0	0	0
>miR167	AT1G19220	6632988	6628059	4929		116	28	8	33	7	3	11	1	6	12	7	1	1	6	1	1	1		116	28	8	33	7	3	11	0	6	12	7	0	0	6	0	0	0		0	0	0	0	0	0	0	0
>miR167	AT1G19850	6886870	6891365	4495		185	25	10	11	19	26	56	27	47	16	53	1	1	7	1	170	24		185	25	10	11	19	26	56	27	47	16	53	0	0	7	0	170	24		0	0	0	2	0	12	2	1
>miR167	AT1G59750	21983049	21988098	5049		21	55	42	61	46	3	28	17	18	5	9	1	1	44	1	23	1		21	55	42	61	46	3	28	17	18	5	9	0	0	44	0	23	0		0	0	6	3	0	6	1	7
>miR167	AT4G23980	12451208	12455277	4069		1	1	1	1	1	1	1	1	1	1	1	1	1	1	1	1	1		0	0	0	0	0	0	0	0	0	0	0	0	0	0	0	0	0		0	16	0	0	0	0	0	0
>miR168	AT5G43810	17628199	17634024	5825		39	9	7	15	1	62	116	51	57	21	27	1	1	33	5	111	30		39	9	7	15	0	62	116	51	57	21	27	0	0	33	5	111	30		0	0	0	0	0	1	28	0
>miR168	AT2G27040	11549435	11543612	5823		59	160	66	41	116	323	187	176	158	72	172	7	1	44	30	77	186		59	160	66	41	116	323	187	176	158	72	172	7	0	44	30	77	186		4	0	1	0	0	17	45	2
>miR169	AT2G34720	14658695	14656846	1849		23	57	47	17	21	19	46	52	32	51	8	18	17	22	1	10	1		23	57	47	17	21	19	46	52	32	51	8	18	17	22	0	10	0		0	0	0	0	0	0	0	0
>miR171	AT5G52510	21324275	21326528	2253		282	63	43	37	69	50	35	48	64	142	66	20	26	76	56	204	44		282	63	43	37	69	50	35	48	64	142	66	20	26	76	56	204	44		0	0	1	0	0	2	4	0
>miR171	AT4G36710	17305762	17307647	1885		13	8	12	7	12	18	6	6	25	13	1	15	5	26	6	1	4		13	8	12	7	12	18	6	6	25	13	0	15	5	26	6	0	4		0	0	0	0	0	0	0	0
>miR171	AT5G41920	16796977	16798473	1496		1	1	1	1	1	1	1	1	1	1	1	1	1	1	1	1	1		0	0	0	0	0	0	0	0	0	0	0	0	0	0	0	0	0		0	2	3	4	0	5	13	7
>miR171	AT2G01570	257549	255248	2301		1	1	1	1	1	12	3	5	7	1	6	1	1	16	45	1	1		0	0	0	0	0	12	3	5	7	0	6	0	0	16	45	0	0		0	0	0	4	0	9	6	1
>miR171	AT3G50650	18819191	18817239	1952		13	24	18	9	1	1	2	1	12	1	1	1	1	1	1	1	1		13	24	18	9	0	0	2	0	12	0	0	0	0	0	0	0	0		0	0	0	0	3	8	7	6
>miR171	AT3G54220	20081136	20083758	2622		60	83	41	72	73	20	27	40	60	84	25	1	2	16	4	29	1		60	83	41	72	73	20	27	40	60	84	25	0	2	16	4	29	1		0	0	0	0	0	0	0	0
>miR171	AT1G21450	7508960	7511790	2830		116	15	30	45	23	8	17	10	11	29	6	1	37	2	5	1	1		116	15	30	45	23	8	17	10	11	29	6	0	37	2	5	0	0		0	0	0	0	0	0	0	0
>miR172	AT3G20840	7300681	7303699	3018		13	1	1	2	1	1	1	1	1	1	1	1	1	1	1	20	1		13	0	0	2	0	0	0	0	0	0	0	0	0	0	0	20	0		0	0	0	0	0	0	0	0
>miR172	AT1G51190	18980952	18984286	3334		19	1	1	20	1	1	1	1	1	8	1	1	1	1	1	117	1		19	0	0	20	0	0	0	0	0	8	0	0	0	0	0	117	0		0	0	0	3	0	0	0	0
>miR172	AT3G54320	20125662	20129617	3955		1	7	3	5	2	35	21	24	32	73	6	1	1	8	22	9	1		0	7	3	5	2	35	21	24	32	73	6	0	0	8	22	9	0		0	0	0	0	0	7	0	0
>miR172	AT4G37750	17739508	17742395	2887		8	140	27	53	11	19	79	43	43	44	52	1	1	4	1	16	1		8	140	27	53	11	19	79	43	43	44	52	0	0	4	0	16	0		0	0	0	0	0	5	0	0
>miR173	AT1G66170	24645157	24642348	2809		1	5	1	1	1	1	1	1	1	1	1	1	1	1	1	1	1		0	5	0	0	0	0	0	0	0	0	0	0	0	0	0	0	0		0	0	0	0	0	0	0	0
>miR319	AT3G02150	391098	392765	1667		1	15	31	1	1	2	1	2	5	1	1	9	3	3	1	1	1		0	15	31	0	0	2	1	2	5	1	0	9	3	3	0	0	0		0	0	0	0	0	0	0	0
>miR319	AT5G60970	24554273	24552796	1477		1	1	16	1	1	1	1	1	1	1	1	1	1	2	1	1	1		0	1	16	0	0	0	0	0	0	0	0	0	0	2	0	0	0		0	0	0	0	0	0	0	0
>miR319	AT3G18550	6383775	6385276	1501		5	2	1	1	1	1	1	1	5	1	1	1	1	1	1	1	40		5	2	0	0	0	0	0	0	5	0	0	0	0	0	0	0	40		0	0	0	0	0	0	0	0
>miR319	AT5G54040	21947863	21946073	1790		4	1	1	10	1	1	1	1	1	28	1	1	1	1	1	15	1		4	0	0	10	0	0	0	0	0	28	0	0	0	0	0	15	0		0	0	0	0	0	0	0	0
>miR319	AT2G30280	12919417	12916670	2747		5	1	12	6	4	6	8	2	14	18	1	1	1	2	1	21	1		5	0	12	6	4	6	8	2	14	18	0	0	0	2	0	21	0		2	10	0	0	0	1	0	0
>miR393	AT5G49980	20353891	20351190	2701		18	10	34	13	28	64	130	31	86	75	59	4	6	102	77	7	23		18	10	34	13	28	64	130	31	86	75	59	4	6	102	77	7	23		0	0	2	0	0	4	0	10
>miR393	AT4G24390	12616127	12613086	3041		25	8	21	10	9	42	12	1	11	38	22	1	75	8	14	12	39		25	8	21	10	9	42	12	0	11	38	22	0	75	8	14	12	39		0	0	0	0	0	0	0	0
>miR393	AT5G48560	19701232	19704377	3145		6	1	1	1	1	1	2	1	3	33	1	1	1	1	1	1	1		6	0	0	0	0	0	2	0	3	33	0	0	0	0	1	0	0		0	0	0	0	0	0	0	0
>miR393	AT1G68920	25918670	25921540	2870		178	33	22	69	32	7	19	15	3	39	130	9	1	2	1	65	113		178	33	22	69	32	7	19	15	3	39	130	9	0	2	0	65	113		0	0	0	0	0	0	0	0
>miR393	AT4G34540	16498396	16502179	3783		45	29	125	38	26	17	7	1	1	6	6	7	1	10	11	22	29		45	29	125	38	26	17	7	0	0	6	6	7	0	10	11	22	29		0	0	0	0	0	0	0	0
>miR394	AT3G18480	6336742	6341794	5052		39	47	30	55	80	34	24	17	28	27	7	5	1	33	1	23	52		39	47	30	55	80	34	24	17	28	27	7	5	1	33	0	23	52		0	0	0	0	0	0	0	0
>miR394	AT1G15530	5341926	5339956	1970		1	1	1	1	1	1	3	1	1	3	1	2	1	3	1	6	1		0	0	0	0	0	0	3	0	0	3	0	2	0	3	0	6	0		0	0	0	0	0	0	0	0
>miR394	AT5G15710	5122495	5124376	1881		5	13	1	1	1	2	2	4	5	1	9	2	1	13	1	2	1		5	13	1	0	0	2	2	4	5	0	9	2	0	13	0	2	0		0	0	0	0	0	0	2	0
>miR394	AT1G30950	11036161	11037489	1328		1	1	1	1	1	1	1	1	1	1	1	1	1	1	1	1	1		0	0	0	0	0	0	0	0	0	0	0	0	0	0	0	0	0		0	0	0	0	0	0	0	0
>miR395	AT1G19920	6916796	6914604	2192		33	228	198	144	293	40	66	83	23	39	84	20	6	56	8	59	116		33	228	198	144	293	40	66	83	23	39	84	20	6	56	8	59	116		0	0	10	1	0	5	7	5
>miR395	AT5G43770	17606025	17606694	669		1	1	1	1	1	1	1	1	1	1	1	1	1	1	1	1	1		0	0	0	0	0	0	0	0	0	0	0	0	0	0	0	0	0		0	0	0	0	0	0	0	0
>miR397	AT5G03260	779423	777020	2403		1	13	5	14	5	5	11	18	30	25	8	1	1	3	4	1	20		0	13	5	14	5	5	11	18	30	25	8	0	0	3	4	0	20		0	0	0	0	0	1	0	0
>miR397	AT2G30210	12896934	12894523	2411		1	1	4	192	1	1	1	1	1	75	1	1	1	1	1	1	1		0	0	4	192	0	0	0	0	0	75	0	0	0	0	0	0	0		0	0	0	0	0	0	0	0
>miR397	AT5G58910	23808907	23806748	2159		1	1	1	1	1	1	1	1	1	1	1	1	1	1	1	1	1		0	0	0	0	0	0	0	0	0	0	0	0	0	0	0	0	0		0	0	0	0	0	0	0	0
>miR397	AT2G40370	16867684	16865244	2440		1	1	1	1	1	1	1	1	1	11	1	1	1	1	1	13	1		0	0	0	0	0	0	0	0	0	11	0	0	0	0	0	13	0		0	0	0	0	0	0	0	0
>miR397	AT5G05390	1594754	1597043	2289		1	1	4	10	25	1	1	1	1	1	1	1	1	1	1	1	1		0	0	4	10	25	0	0	0	0	0	0	0	0	1	0	0	0		0	0	0	0	0	0	0	0
>miR397	AT3G09220	2830548	2827245	3303		1	1	1	1	1	1	1	1	1	1	1	1	1	1	4	1	1		0	0	0	0	0	0	0	0	0	0	0	0	0	0	4	0	0		0	0	0	1	0	0	0	0
>miR397	AT2G46570	19133944	19136141	2197		1	6	1	4	10	1	1	1	1	1	34	1	1	1	1	1	1		0	6	0	4	10	0	0	0	0	0	34	0	0	1	0	0	0		0	0	0	0	0	0	0	0
>miR397	AT5G01190	72391	74755	2364		1	1	1	1	1	1	1	1	1	1	1	1	1	1	1	1	1		0	0	0	0	0	0	0	0	0	0	0	0	0	0	0	0	0		0	0	0	0	0	0	0	0
>miR397	AT5G07130	2210570	2212621	2051		1	1	1	1	1	4	4	1	4	3	1	1	4	1	1	16	5		0	0	0	0	0	4	4	0	4	3	0	0	4	0	0	16	5		0	0	0	0	0	0	0	0
>miR397	AT5G01040	16172	13127	3045		1	1	1	1	1	1	1	1	1	1	1	1	1	1	6	1	1		0	0	0	0	0	0	0	0	0	0	0	0	0	0	6	0	0		0	0	0	2	0	0	0	0
>miR397	AT5G01050	20811	18085	2726		1	1	1	1	1	1	1	1	1	1	1	1	1	1	1	1	1		0	0	0	0	0	0	0	0	0	0	0	0	0	0	0	0	0		0	0	0	0	0	0	0	0
>miR398	AT5G18100	5987189	5988887	1698		13	6	39	17	95	17	40	28	35	32	57	11	17	56	3	45	23		13	6	39	17	95	17	40	28	35	32	57	11	17	56	3	45	23		205	92	118	207	138	5	12	26
>miR399	AT2G16920	7346249	7341308	4941		40	73	24	19	19	22	35	14	16	35	33	1	32	34	13	19	6		40	73	24	19	19	22	35	14	16	35	33	0	32	34	13	19	6		0	0	0	0	0	0	0	0
>miR399	AT1G53020	19763142	19755040	8102		1	1	1	1	1	1	1	1	1	1	1	1	1	4	1	1	1		0	0	0	0	0	0	0	0	0	0	0	0	0	4	0	0	0		0	0	0	0	0	0	0	0
>miR403	AT5G43810	17628199	17634024	5825		39	9	7	15	1	62	116	51	57	21	27	1	1	33	5	111	30		39	9	7	15	0	62	116	51	57	21	27	0	0	33	5	111	30		0	0	0	0	0	1	28	0
>miR403	AT1G48410	17896254	17889766	6488		16	12	7	1	18	239	177	124	255	116	62	41	81	150	112	189	168		16	12	7	0	18	239	177	124	255	116	62	41	81	150	112	189	168		4	0	3	9	12	27	20	8
>miR447	AT1G49920	18487901	18485442	2459		1	1	1	1	1	1	1	1	1	1	1	1	1	1	1	1	1		0	0	0	0	0	0	0	0	0	0	0	0	0	0	0	0	0		0	0	0	0	0	0	0	0
>miR472	AT3G50950	18946656	18949780	3124		89	44	198	45	33	3	4	6	4	1	33	9	1	20	23	1	1		89	44	198	45	33	3	4	6	4	0	33	9	0	20	23	0	0		4	0	0	0	0	4	5	1
>miR472	AT1G50180	18587903	18590804	2901		1	1	1	1	1	1	1	1	1	1	1	1	1	1	1	1	1		0	0	0	0	0	0	0	0	0	0	0	0	0	0	0	0	0		0	0	0	0	0	0	0	0
>miR472	AT1G59780	22001356	21997246	4110		18	1	1	1	1	1	1	1	1	1	1	1	1	1	1	45	1		18	0	0	0	0	0	0	0	0	0	0	0	0	0	0	45	0		0	0	0	0	0	0	0	0
>miR773	AT5G49160	19949456	19955595	6139		105	95	62	45	23	59	42	30	15	35	19	1	6	14	32	21	32		105	95	62	45	23	59	42	30	15	35	19	0	6	14	32	21	32		0	0	0	0	0	0	2	0
>miR774	AT4G05080	2602999	2604174	1175		1	1	1	1	1	1	1	1	1	1	1	1	1	1	1	1	1		0	0	0	0	0	0	0	0	0	0	0	0	0	0	0	0	0		0	0	0	0	0	0	0	0
>miR774	AT1G54550	20373318	20374653	1335		1	1	1	1	1	1	1	1	1	1	1	1	1	1	1	1	1		0	0	0	0	0	0	0	0	0	0	0	0	0	0	0	0	0		0	0	0	0	0	0	0	0
>miR774	AT5G42460	16997013	16998343	1330		1	1	1	1	1	1	1	1	1	1	1	1	1	1	1	1	1		0	0	0	0	0	0	0	0	0	0	0	0	0	0	0	0	0		0	0	0	0	0	0	0	0
>miR774	AT4G33290	16049577	16050869	1292		1	1	1	1	1	1	1	1	1	1	1	1	1	1	1	1	1		0	0	0	0	0	0	0	0	0	0	0	0	0	0	0	0	0		0	0	0	0	0	0	0	0
>miR774	AT3G24580	8969169	8970305	1136		1	1	1	1	1	1	1	1	1	1	1	1	1	1	1	1	1		0	0	0	0	0	0	0	0	0	0	0	0	0	0	0	0	0		0	0	0	0	0	0	0	0
>miR774	AT5G41500	16621230	16622441	1211		1	1	1	1	1	1	1	1	1	1	1	1	1	1	1	1	1		0	0	0	0	0	0	0	0	0	0	0	0	0	0	0	0	0		0	0	0	0	0	0	0	0
>miR774	AT3G17320	5916662	5915433	1229		1	1	1	1	1	1	1	1	1	1	1	1	1	1	1	1	1		0	0	0	0	0	0	0	0	0	0	0	0	0	0	0	0	0		0	0	0	0	0	0	0	0
>miR774	AT3G16740	5699339	5700832	1493		1	1	1	1	1	1	1	1	1	1	1	1	1	1	1	1	1		0	0	0	0	0	0	0	0	0	0	0	0	0	0	0	0	0		3	0	0	0	0	0	0	4
>miR775	AT2G26100	11125286	11122983	2303		44	66	9	33	107	1	1	1	1	1	1	1	1	9	13	1	1		44	66	9	33	107	0	0	0	0	0	0	0	0	9	13	0	0		0	0	0	0	0	0	0	0
>miR775	AT1G05170	1494247	1491110	3137		19	15	9	12	17	14	3	7	9	26	1	10	5	7	17	13	43		19	15	9	12	17	14	3	7	9	26	0	10	5	7	17	13	43		0	0	0	0	0	0	0	0
>miR778	AT5G04940	1456991	1454168	2823		1	1	1	1	1	1	1	1	1	1	1	1	1	1	4	1	1		0	0	0	0	0	0	0	0	0	0	0	0	0	0	4	0	0		0	0	0	0	0	0	4	0
>miR778	AT4G13460	7827000	7824030	2970		9	8	8	1	17	9	16	30	49	7	13	25	3	26	37	28	4		9	8	8	0	17	9	16	30	49	7	13	25	3	26	37	28	4		12	0	0	0	0	4	0	0
>miR778	AT1G73100	27494845	27497843	2998		100	58	25	34	34	28	27	19	33	20	19	3	9	14	40	6	1		100	58	25	34	34	28	27	19	33	20	19	3	9	14	40	6	0		0	0	0	0	0	0	0	0
>miR780	AT1G64170	23821956	23818902	3054		20	1	10	1	1	1	1	1	1	17	1	1	13	1	16	26	1		20	0	10	0	0	0	0	0	0	17	1	0	13	0	16	26	0		0	0	0	0	0	0	0	0
>miR780	AT4G23700	12346053	12342438	3615		107	1	3	37	1	4	1	1	1	44	1	1	35	8	1	58	1		107	0	3	37	0	4	0	0	0	44	0	0	35	8	0	58	0		2	8	0	0	0	0	0	0
>miR780	AT3G17630	6029207	6031779	2572		2	2	6	10	1	9	1	1	4	1	12	1	1	1	1	3	1		2	2	6	10	0	9	0	0	4	0	12	0	0	0	0	3	0		0	0	0	0	0	0	0	0
>miR780	AT2G13620	5685088	5687703	2615		1	1	1	1	1	1	1	1	1	1	1	1	1	1	1	1	1		0	0	0	0	0	0	0	0	0	0	0	0	0	0	0	0	0		0	0	0	0	0	0	0	0
>miR823	AT4G19020	10414537	10421220	6683		66	239	4	37	12	14	21	17	17	14	15	1	1	10	1	5	1		66	239	4	37	12	14	21	17	17	14	15	0	0	10	0	5	1		0	0	0	0	0	0	0	0
>miR823	AT4G14920	8535838	8531153	4685		1	17	2	9	18	10	10	4	12	8	34	1	1	10	1	28	1		1	17	2	9	18	10	10	4	12	8	34	0	0	10	0	28	0		0	0	0	0	0	0	0	0
>miR824	AT4G37940	17838615	17835689	2926		5	1	1	2	1	1	1	1	1	19	1	1	1	1	1	63	1		5	0	0	2	0	0	0	0	0	19	0	0	0	0	0	63	0		0	0	0	0	0	0	0	0
>miR824	AT4G24540	12674082	12670980	3102		1	4	78	1	5	9	19	5	2	1	7	25	19	148	1	2	1		0	4	78	0	5	9	19	5	2	0	7	25	19	148	0	2	0		0	0	0	0	0	0	0	0
>miR824	AT2G22630	9625452	9628961	3509		1	1	1	1	1	1	1	1	1	1	1	1	1	1	1	1	1		0	0	0	0	0	0	0	0	0	0	0	0	0	0	0	0	0		0	0	0	0	0	0	0	0
>miR824	AT2G22540	9586954	9590973	4019		32	19	98	45	1	12	16	6	5	96	1	181	73	142	1	13	1		32	19	98	45	0	12	16	6	5	96	0	181	73	142	0	13	0		0	0	0	8	0	0	0	0
>miR827	AT2G25480	10849941	10852776	2835		1	1	1	1	1	1	1	1	1	1	1	1	1	1	1	1	1		0	0	0	0	0	0	0	0	0	0	0	0	0	0	0	0	0		0	0	14	0	0	0	1	0
>miR827	AT2G33810	14312077	14313148	1071		1	139	6	4	302	503	670	498	459	1	401	47	1	29	1	1	323		0	139	6	4	302	503	670	498	459	0	401	47	0	29	0	0	323		0	3	0	0	0	12	16	20
>miR827	AT1G18740	6463985	6466445	2460		151	32	22	83	17	1	2	1	4	1	3	1	1	19	1	4	1		151	32	22	83	17	1	2	0	4	0	3	0	0	19	0	4	0		9	5	4	26	2	6	0	0
>miR828	AT1G74430	27978840	27981095	2255		1	5	9	1	4	39	65	80	58	2	87	10	1	19	1	1	153		0	5	9	0	4	39	65	80	58	2	87	10	0	19	0	0	153		0	0	0	0	0	0	0	0
>miR828	AT1G66230	24680817	24682078	1261		1	1	4	1	7	1	6	1	1	1	1	1	1	1	1	1	1		0	0	4	0	7	0	6	0	0	0	0	0	0	0	0	0	0		0	0	0	0	0	0	0	0
>miR828	AT5G60890	24511917	24513577	1660		3	6	45	97	3	2	1	1	1	166	1	1	1	11	1	1	9		3	6	45	97	3	2	0	1	0	166	0	0	0	11	0	0	9		0	0	0	0	0	0	0	0
>miR842	AT5G49850	20279811	20277134	2677		136	1	1	1	1	1	1	1	1	1	1	1	1	1	1	19	1		136	0	0	0	0	0	0	0	0	0	0	0	0	0	0	19	0		3	0	0	0	0	0	0	0
>miR842	AT5G49870	20289774	20287418	2356		1	1	1	1	1	1	1	1	1	1	1	1	1	1	1	1	1		0	0	0	0	0	0	0	0	0	0	0	0	0	0	0	0	0		0	0	0	0	0	0	0	0
>miR844	AT3G20200	7047587	7051348	3761		1	1	1	1	1	1	1	1	1	1	1	1	1	1	1	1	1		0	0	0	0	0	0	0	0	0	0	0	0	0	0	0	0	0		0	0	0	0	0	0	0	0
>miR844	AT3G49060	18202920	18198199	4721		44	8	43	8	7	5	30	7	11	12	2	1	4	21	1	50	64		44	8	43	8	7	5	30	7	11	12	2	0	4	21	0	50	64		0	0	0	0	0	0	0	0
>miR844	AT4G25160	12907348	12903308	4040		4	1	1	4	1	15	1	1	5	1	1	1	1	1	1	2	1		4	0	0	4	0	15	0	0	5	0	0	0	0	0	0	2	0		0	0	0	0	0	0	7	0
>miR846	AT5G38550	15453004	15450011	2993		1	1	1	1	1	1	1	1	1	1	1	1	1	1	1	1	1		0	0	0	0	0	0	0	0	0	0	0	0	0	0	0	0	0		0	0	0	0	0	0	0	0
>miR846	AT5G35950	14122173	14123994	1821		1	1	1	1	1	1	1	1	1	1	1	1	1	1	1	1	1		0	0	0	0	0	0	0	0	0	0	0	0	0	0	0	0	0		0	0	0	0	0	0	0	0
>miR846	AT1G52120	19401904	19399750	2154		100	1	2	10	1	1	1	1	1	3	1	1	1	1	1	107	1		100	0	2	10	0	0	0	0	0	3	1	0	0	0	0	107	0		0	0	0	0	0	0	0	0
>miR856	AT4G23700	12346053	12342438	3615		107	1	3	37	1	4	1	1	1	44	1	1	35	8	1	58	1		107	0	3	37	0	4	0	0	0	44	0	0	35	8	0	58	0		2	8	0	0	0	0	0	0
>miR856	AT3G53720	19921090	19916656	4434		1	1	1	1	1	1	1	1	1	1	1	1	1	1	1	1	1		0	0	0	0	0	0	0	0	0	0	0	0	0	0	0	0	0		4	0	0	0	0	0	0	0
>miR856	AT3G17630	6029207	6031779	2572		2	2	6	10	1	9	1	1	4	1	12	1	1	1	1	3	1		2	2	6	10	0	9	0	0	4	0	12	0	0	0	0	3	0		0	0	0	0	0	0	0	0
>miR856	AT2G13620	5685088	5687703	2615		1	1	1	1	1	1	1	1	1	1	1	1	1	1	1	1	1		0	0	0	0	0	0	0	0	0	0	0	0	0	0	0	0	0		0	0	0	0	0	0	0	0
>miR856	AT1G64170	23821956	23818902	3054		20	1	10	1	1	1	1	1	1	17	1	1	13	1	16	26	1		20	0	10	0	0	0	0	0	0	17	1	0	13	0	16	26	0		0	0	0	0	0	0	0	0
>miR857	AT5G01050	20811	18085	2726		1	1	1	1	1	1	1	1	1	1	1	1	1	1	1	1	1		0	0	0	0	0	0	0	0	0	0	0	0	0	0	0	0	0		0	0	0	0	0	0	0	0
>miR857	AT5G01040	16172	13127	3045		1	1	1	1	1	1	1	1	1	1	1	1	1	1	6	1	1		0	0	0	0	0	0	0	0	0	0	0	0	0	0	6	0	0		0	0	0	2	0	0	0	0
>miR857	AT2G46570	19133944	19136141	2197		1	6	1	4	10	1	1	1	1	1	34	1	1	1	1	1	1		0	6	0	4	10	0	0	0	0	0	34	0	0	1	0	0	0		0	0	0	0	0	0	0	0
>miR857	AT2G38080	15941538	15944694	3156		1	300	9	73	87	157	31	47	361	85	251	1	10	24	5	1	74		0	300	9	73	87	157	31	47	361	85	251	0	10	24	5	0	74		0	0	0	4	0	0	0	0
>miR857	AT2G29130	12534776	12531966	2810		1	1	3	90	4	5	1	7	1	14	1	1	1	11	1	1	22		0	0	3	90	4	5	0	7	0	14	0	0	0	11	0	0	22		0	0	0	0	0	0	0	0
>miR858	AT3G13540	4420180	4421708	1528		1	1	1	1	1	1	1	1	1	1	1	1	1	1	1	1	1		0	0	0	0	0	0	0	0	0	0	0	0	0	0	0	0	0		0	0	0	0	15	0	0	0
>miR858	AT2G31180	13295253	13293798	1455		14	1	5	1	1	1	1	1	1	1	1	1	1	1	1	1	1		14	0	5	0	0	0	0	0	0	0	0	0	0	0	0	0	0		0	0	0	0	0	0	0	0
>miR858	AT1G35515	13077904	13080243	2339		145	121	167	196	39	13	58	63	44	70	12	1	13	33	8	103	48		145	121	167	196	39	13	58	63	44	70	12	1	13	33	8	103	48		0	0	0	16	5	0	5	20
>miR858	AT1G34670	12709106	12710401	1295		1	1	8	50	1	1	1	1	1	4	1	1	1	1	1	1	1		0	0	8	50	0	0	0	0	0	4	0	0	0	0	0	0	0		0	0	0	0	0	0	0	0
>miR858	AT1G18710	6450586	6453106	2520		1	1	20	1	3	2	1	3	1	1	1	1	1	8	1	1	1		0	0	20	0	3	2	0	3	0	0	0	0	0	8	0	0	0		0	4	9	0	0	9	0	0
>miR858	AT4G01680	717579	716004	1575		1	1	1	1	18	3	4	1	1	35	1	1	1	12	1	1	50		0	1	0	0	18	3	4	0	0	35	0	0	0	12	0	0	50		0	0	0	0	0	0	0	0
>miR858	AT2G31180	13295253	13293798	1455		14	1	5	1	1	1	1	1	1	1	1	1	1	1	1	1	1		14	0	5	0	0	0	0	0	0	0	0	0	0	0	0	0	0		0	0	0	0	0	0	0	0
>miR859	AT1G10890	3627726	3632131	4405		6	1	3	3	1	56	45	21	20	55	17	5	5	12	1	142	50		6	0	3	3	0	56	45	21	20	55	17	5	5	12	0	142	50		0	0	0	0	0	0	1	0
																					paralog			CAF	INF	LEF	ROF	SIF	AP1	AP3	AGM	INS	ROS	SAP	S04	S52	LES	GSE	CAS	SIS
																						sense		23.7914	24.1439	16.5108	18.2374	15.9209	18.2014	19.2014	16.0216	19.9137	16.1439	16.1583	4.28777	5.66906	13.1727	5.1295	19.0935	15.1871
																						antisense		0.0272735	0.0451061	0.0250235	0.0497294	0.0271255	0.0570839	0.0585071	0.0334036	0.0286636	0.0520598	0.0494211	0.0255367	0.0340173	0.0404537	0.124388	0.010457	0.0081543
[truncated: 26 more columns]
